# Graphical Abstract

## Integrative Modeling of the Spread of Serious Infectious Diseases and Corresponding Wastewater Dynamics

Nina Schmid, Julia Bicker, Andreas F. Hofmann, Karina Wallrafen-Sam, David Kerkmann, Andreas Wieser, Martin J. Kühn, Jan Hasenauer

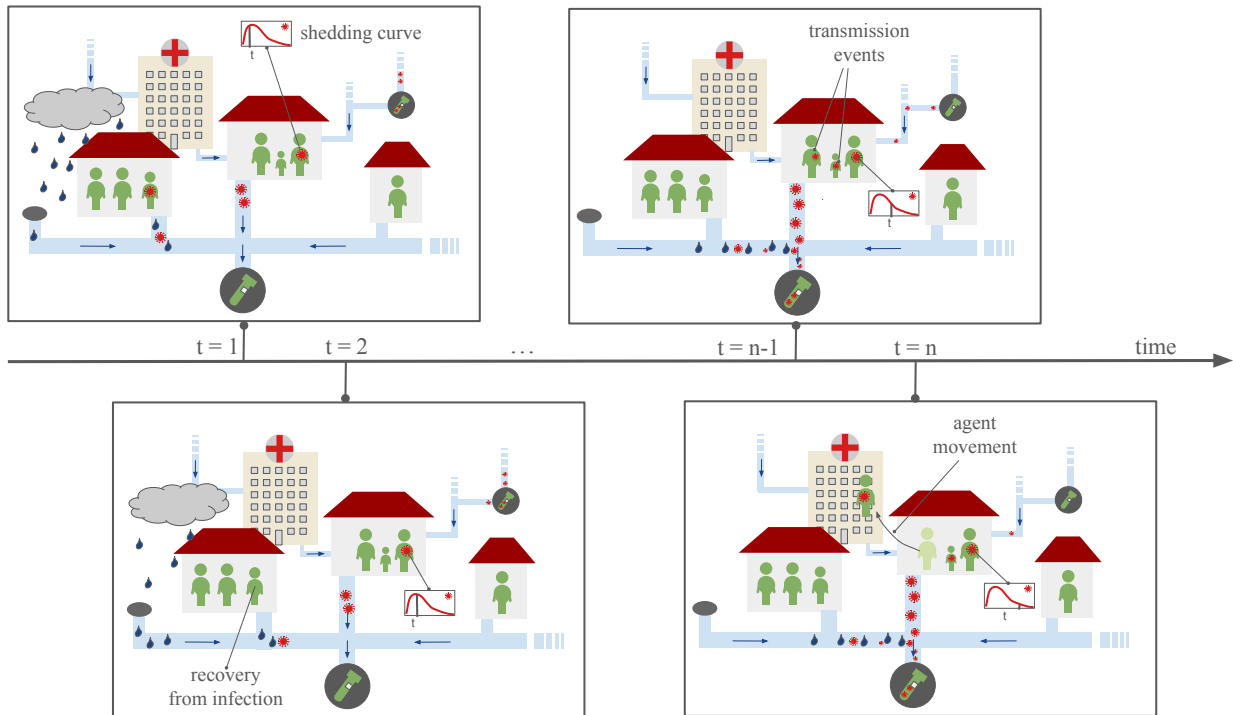

## Highlights

### **Integrative Modeling of the Spread of Serious Infectious Diseases and Corresponding Wastewater Dynamics**

Nina Schmid, Julia Bicker, Andreas F. Hofmann, Karina Wallrafen-Sam, David Kerkmann, Andreas Wieser, Martin J. Kühn, Jan Hasenauer

- Integration of infection and wastewater models to simulate disease spread.
- Identification of factors affecting wastewater measurements.
- Illustration of ability of wastewater-based surveillance to predict outbreaks before case reporting.
- Demonstration of unreliability of flow rate normalization in case of rainwater infiltration.
- Optimization of wastewater-based surveillance for improved public health monitoring.

# Integrative Modeling of the Spread of Serious Infectious Diseases and Corresponding Wastewater Dynamics

Nina Schmid<sup>a</sup>, Julia Bicker<sup>b</sup>, Andreas F. Hofmann<sup>c</sup>, Karina Wallrafen-Sam<sup>a</sup>, David Kerkmann<sup>d</sup>, Andreas Wieser<sup>e,f,g</sup>, Martin J. Kühn<sup>a,b</sup>, Jan Hasenauer<sup>a,h,i</sup>

<sup>a</sup> *Life & Medical Sciences (LIMES) Institute, University of Bonn, Bonn, Germany*

<sup>b</sup> *Institute of Software Technology, Department of High-Performance Computing, German Aerospace Center, Cologne, Germany*

<sup>c</sup> *tandler.com GmbH, Buch am Erlbach, Germany*

<sup>d</sup> *Helmholtz Centre for Infection Research, Brunswick, Germany*

<sup>e</sup> *Institute of Infectious Diseases and Tropical Medicine, LMU University Hospital Munich, Munich, Germany*

<sup>f</sup> *German Centre for Infection Research (DZIF), Partner Site Munich, Munich, Germany*

<sup>g</sup> *Max von Pettenkofer Institute, Faculty of Medicine, LMU Munich, Munich, Germany*

<sup>h</sup> *Technische Universität München, Center for Mathematics, Garching, Germany*

<sup>i</sup> *Helmholtz Zentrum München, German Research Center for Environmental Health, Computational Health Center, Neuherberg, Germany*

---

## Abstract

The COVID-19 pandemic has emphasized the critical need for accurate disease modeling to inform public health interventions. Traditional reliance on confirmed infection data is often hindered by reporting delays and under-reporting, while widespread antigen and antibody testing can be costly and impractical. Wastewater-based surveillance offers a promising alternative by detecting viral concentrations from fecal shedding, potentially providing a more accurate estimate of true infection prevalence. However, challenges remain in optimizing sampling protocols, locations, and normalization strategies, particularly in accounting for environmental factors like precipitation.

We present an integrative model that simulates the spread of serious infectious diseases by linking detailed infection dynamics with wastewater processes through viral shedding curves. Through comprehensive simulations, we examine how virus characteristics, precipitation events, measurement protocols, and normalization strategies affect the relationship between infection dynamics and wastewater measurements. Our findings reveal a complex relationship between disease prevalence and corresponding wastewater concentrations, with

---

*Email address:* [nina.schmid@uni-bonn.de](mailto:nina.schmid@uni-bonn.de) (Nina Schmid)

key variability sources including upstream sampling locations, continuous rainfall, and rapid viral decay. Notably, we find that flow rate normalization can be unreliable when rainwater infiltrates sewer systems. Despite these challenges, our study demonstrates that wastewater-based surveillance data can serve as a leading indicator of disease prevalence, predicting outbreak peaks before they occur. The proposed integrative model can thus be used to optimize wastewater-based surveillance, enhancing its utility for public health monitoring.

*Keywords:* infectious diseases, wastewater, agent-based model, hydrodynamic model, sewer network, shedding model

---

## 1. Introduction

The COVID-19 pandemic has highlighted the need for effective real-time monitoring and prediction of infectious disease dynamics to support timely and informed intervention policies. In this context, various studies have been conducted to assess vaccine distribution strategies [6, 12] or the effectiveness of non-pharmaceutical interventions like telework suggestions, prohibition of private gatherings of certain sizes, or partial lock-downs [39, 7, 27, 19].

The spread of infectious diseases is nowadays modeled using a broad range of approaches, including statistical and machine learning models [39, 27, 33], compartmental and meta-population models [10, 6, 45], and agent-based models [7, 29, 22, 15], or even hybrid approaches [18, 4]. Among these approaches, agent-based models (ABMs) allow for the most detailed description of disease dynamics. ABMs simulate the spread of infectious diseases on an individual level, thereby facilitating the incorporation of comprehensive information about localization, interaction, and behavior. The models are intrinsically stochastic and based on discrete- or continuous-time Markov processes. While ABMs are the state-of-the-art in infectious disease modeling, their advancement remains an active field of research. A key challenge is the choice of model parameters.

The predictive power of models for the spread of infectious diseases depends on the available data and the ability to incorporate them into models. The number of confirmed infections is the most common data source. However, confirmed infections are affected by reporting delays [26] and subject to under-reporting [28], limiting the reliability of the resulting models [35]. While single antigen and antibody tests can be cheap, the use of these tests to study large, representative population cohorts is resource intensive. Furthermore, even the cohort might be subject to sampling bias [30, 17]. Wastewater-based surveillance presents a promising solution to these issues by capturing viral concentrations from all infected individuals within a catchment area, including those who are asymptomatic or undetected by traditional testing methods. Via detection of viral RNA in sewage, outbreaks can be identified before clinical cases are reported. This capability was demonstrated during the COVID-19 pandemic, when several national wastewater-based surveillance programs were

29 established, e.g. the AMELAG project in Germany [37]. Wastewater-based surveillance is  
30 applicable to various diseases detectable in sewage, including poliovirus, hepatitis, norovirus,  
31 and influenza [23], but also to monitoring antimicrobial resistance [9]. Yet, infectious dis-  
32 ease monitoring based on wastewater-based surveillance data still presents several significant  
33 challenges: The choice of the sampling location can yield different viral concentrations due  
34 to the interplay of population density and sewer infrastructure. The impact of viral degrada-  
35 tion and variations in flow-time on measurements is not well understood. The environmental  
36 conditions, e.g. rain fall, can impact measurement and the effectiveness of established nor-  
37 malization strategies, such as flow-based adjustments, remains unclear. Despite these chal-  
38 lenges, integrating wastewater data with traditional infectious disease models holds promise  
39 for improving prediction accuracy and has been attempted in several studies [8, 32].

40 The challenges of wastewater-based surveillance data can in principle be addressed using  
41 comprehensive computational models which provide in-depth descriptions of the spread of  
42 infectious diseases as well as wastewater dynamics. Yet, to the best of our knowledge, most  
43 published studies use relatively simple approaches. For example, Wu et al. [43] calculated a  
44 rough estimate of SARS-CoV-2 prevalence upstream of a wastewater treatment facility using  
45 the normalized viral load measured in twelve wastewater samples and assumptions about  
46 the sewer system flow volume, stool sizes, and average viral concentration in stool among  
47 infected persons. The authors concluded that prevalence in their population of interest was  
48 much higher than the confirmed case count, even under conservative assumptions, but noted  
49 that their estimate was subject to considerable uncertainty, as they did not account for the  
50 timeline of viral shedding or the loss of viral copies along sewer lines, among other fac-  
51 tors. Hart and Halden [14] used a simplified hydrodynamic model of a city sewer network  
52 to estimate SARS-CoV-2 detectability in wastewater under different temperature-driven de-  
53 cay scenarios. This study highlighted the importance of appropriately accounting for viral  
54 decay when analyzing wastewater data, but the authors assumed exclusively dry weather  
55 conditions and their consideration of the relationship between SARS-CoV-2 prevalence and  
56 viral load entering the sewer system was limited; accounting for variations in viral shedding  
57 across individuals and over time was out of the study’s scope. Peccia et al. [34] compared  
58 wastewater-based surveillance data to positive COVID-19 tests and hospital admissions using  
59 a basic distributed lag time series model and found that the former led the latter data by  
60 several days. This approach highlighted the potential of wastewater data to provide early  
61 warnings of outbreaks, but relied on the assumption that the observed wastewater measure-  
62 ments were unbiased. Finally, Nourbakhsh et al. [32] coupled an SEIR-type compartment  
63 model of SARS-CoV-2 transmission with a simple advection-dispersion-decay model of virus  
64 concentration dynamics in a sewer system to estimate cumulative incidence in several cities  
65 based on empirical wastewater measurements and reported case data. However, because of a  
66 limited sewer system model and the use of ordinary differential equations, the model was not  
67 well adapted for scenarios such as small communities or low-prevalence settings. To the best

68 of our knowledge, no existing study on wastewater-based infectious disease monitoring uses  
69 advance methods from the well-established field of sewage network modeling [38]. This is  
70 problematic as wastewater dynamics in sewage networks are highly complex and require ad-  
71 vanced modeling tools for the prediction of pollutant load [2]. Accordingly, advances beyond  
72 these existing methodological frameworks could significantly enhance our understanding of  
73 disease spread and lead to more effective public health interventions.

74 Our work contributes to the field by integrating an agent-based model (ABM) for infection  
75 dynamics, a viral shedding model, and a detailed hydrodynamic model of sewage flow and  
76 viral load. We provide the mathematical details and a numerical implementation. Through  
77 simulation studies for a respiratory virus (Section 3.1), we investigate the effects of mea-  
78 surement protocols (Section 3.3 and Section 3.4), precipitation events (Section 3.5), viral  
79 decay (Section 3.6), and normalization strategies (Section 3.7) on the relationship between  
80 infection dynamics and wastewater measurements. This controlled setting enables an in-  
81 depth model-based analysis and practical recommendations for real-world wastewater-based  
82 surveillance. Our findings advance the development of detailed integrative models informed  
83 by data, enhancing the accuracy and reliability of infectious disease monitoring and predic-  
84 tion. Furthermore, the integrated model provides a basis for coherent data integration.

## 85 2. Mathematical Model

86 To study wastewater-based surveillance data, we combine state-of-the-art models for the  
87 spread of infectious diseases and wastewater dynamics (Fig. 1). The link is established using  
88 a viral shedding model. In this section, we outline the mathematical formulations of the  
89 individual models' components and their simulation algorithms as well as their integration.  
90 All models are dynamic and are executed on the same time axis such that a coupling with  
91 comparisons of outputs is possible.

### 92 2.1. Overview

93 The proposed model consists of three modules:

94 The **infection dynamics model** describes the time-dependent location and infection state  
95 of individual persons, in the following also denoted as agents. The infection state of agents  
96 can change due to events such as virus transmission, worsening of symptoms, or recovery. The  
97 likelihood of an agent infecting others is determined by its viral load, which varies throughout  
98 its infection course, and the length of contact.

99 The **shedding model** describes the release of virus and viral fragments from infected in-  
100 dividuals into their surroundings. It is used in the infection dynamics model to determine  
101 the transmission probability as well as to describe the release through urine and stool. The

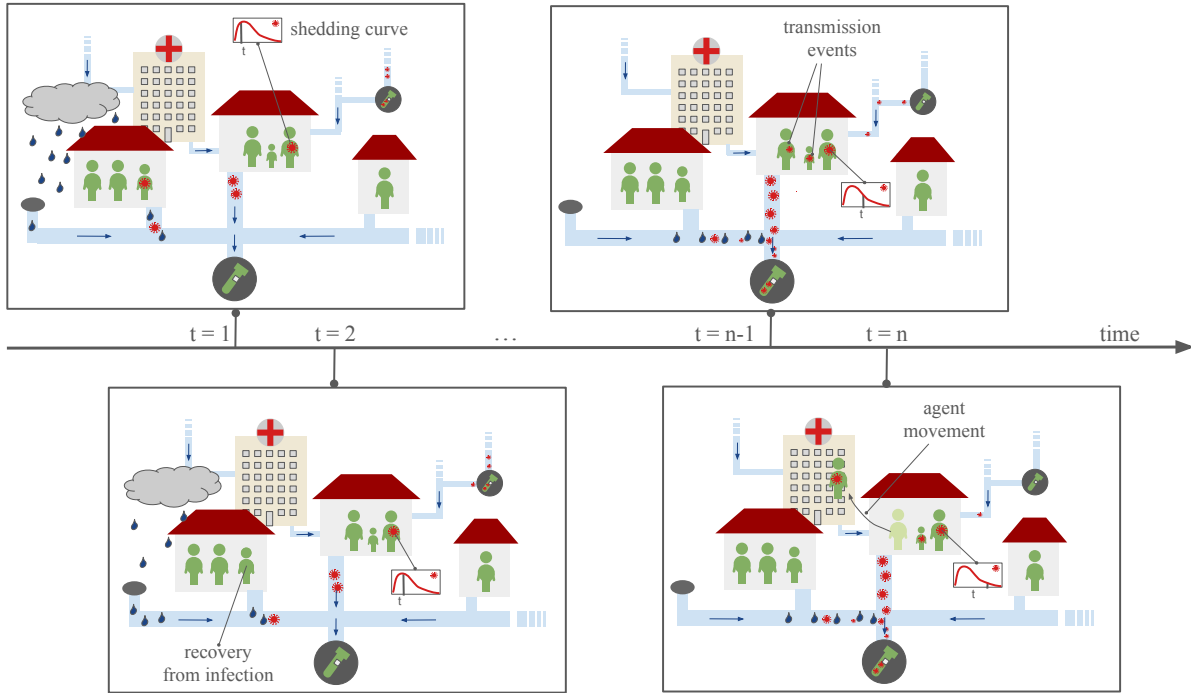

Figure 1: **Model Visualization.** Based on infection dynamics and the movement of agents, RNA is shed at specific locations and time points into the sewer system. This information is propagated over time to simulate the concentration measurements in wastewater. Among other elements, the model can account for precipitation events, sampling protocols, viral load dynamics, and RNA degradation. The figure only depicts a simplified neighborhood with locations of type home or hospital, while the model used for this study allows for various types of agent movements (Section 2.2.1).

102 shedding curve is assumed to be dependent on the individual’s viral load, which is time-  
 103 dependent and initially increases before declining as the host’s immune response takes effect.  
 104 The shedding model uses the infection state of agents and their time since transmission,  
 105 which are provided by the infection dynamics model, to determine the viral RNA entering  
 106 the wastewater system.

107 The **wastewater dynamics model** simulates the transport and degradation of viral RNA  
 108 within the sewage network. Using the viral shedding input from the shedding model as well  
 109 as the agents’ locations from the infection dynamics model, this module calculates the RNA  
 110 concentrations at various points in the network, accounting for factors such as viral decay,  
 111 flow rates, and the architecture of the sewer system. The output of this model is the RNA  
 112 concentration at different sampling points, which provides a comprehensive picture of the  
 113 data to be expected from wastewater-based surveillance.

114 In the current model, the wastewater does not influence the infection dynamics; accordingly,  
 115 the integrated model possesses a hierarchical structure. In the following, we discuss the  
 116 individual modules in more detail.

## 117 2.2. Modeling Infection Dynamics

118 In this study, we use an *agent-based model* (ABM) implemented in the software framework  
119 MEmilio [24] to simulate disease states and mobility patterns at the *agent* level, providing a  
120 fine-grained view of disease dynamics. It comprises agents with different attributes.

121 The properties of an *agent*  $\alpha$  are defined via an  $m$ -tuple  $(a_1, \dots, a_m) \in \Omega$  with  $m$  different  
122 attributes  $a_i$ ,  $i = 1, \dots, m$ . The attributes can be static – meaning that they do not change  
123 over the course of the simulation – or dynamic. The static attributes are:

- 124 • An agent’s age group  $\mathcal{A}^{(\alpha)} \in \{1, \dots, n_A\}$ , with  $n_A$  denoting the total number of age  
125 groups.
- 126 • An agent’s set of locations  $\mathcal{L}^{(\alpha)} = \{l_j\}_{j \in K^{(\alpha)}}$  with  $K^{(\alpha)} \subset \{1, \dots, n_L\}$  denoting the subset  
127 of all locations it can theoretically move to during a simulation.

128 The dynamic attributes are:

- 129 • An agent’s current location  $l^{(\alpha)} \in \mathcal{L}^{(\alpha)}$ .
- 130 • An agent’s current infection state  $s^{(\alpha)} \in \mathcal{S}$ , with  $\mathcal{S}$  denoting a set of infection states.
- 131 • An agent’s time since virus exposure  $\tau^{(\alpha)}$  in hours, which is set to NaN if the agent has  
132 not been infected.

133 The simulation of the ABM provides information about the agent’s trajectory in space and in-  
134 fection state. In the following, we provide additional details on the ABM, providing the basis  
135 for the simulation of mobility (Algorithm 1) and the full population dynamics (Algorithm 2).

### 136 2.2.1. Mobility Model

137 The ABM uses a location graph with  $n_L$  locations,  $l_1, \dots, l_{n_L}$ , to model mobility. Every  
138 location has a *location type*  $T \in \mathcal{T}$  with  $\mathcal{T}$  being a set of location types such as *Home*,  
139 *School*, *Work*, *Recreation*, *Shop*, *Hospital*, and *Intensive Care Unit (ICU)*. There can be  
140 multiple locations of the same type. In addition to the type, a location also has a capacity  
141 specifying the maximum number of agents that can enter the location and a maximum  
142 number of contacts an agent can have at the location. Every agent  $\alpha$  has a set of  $n_\alpha$  many  
143 locations  $\mathcal{L}^{(\alpha)} = \{l_j\}_{j \in K^{(\alpha)}}$ , with  $K^{(\alpha)} \subset \{1, \dots, n_L\}$  being an index set, that are assigned to  
144 it. These assigned locations are the ones the agent can move between, meaning that it is  
145 restricted to a subgraph of the global location graph (see Supplementary Fig. B.1(b)). We  
146 denote the current location of an agent  $\alpha$  at a given time point  $\tilde{t}$ , with  $\tilde{t}$  given in hours, as  
147  $l^{(\alpha)}(\tilde{t}) \in \mathcal{L}^{(\alpha)}$ . Movements, i.e. location transitions, are modeled by an ordered set of mobility



---

**Algorithm 1: ABM Mobility.**


---

**1 Input:** Agent  $\alpha$ , time point  $\tilde{t}_k$ , agent's location  $l^{(\alpha)}(\tilde{t}_k)$   
**2 Output:** Agent's location  $l^{(\alpha)}(\tilde{t}_{k+1})$   
**3** Set  $l_{new} = l^{(\alpha)}(\tilde{t}_k)$   
**4 Forall** mobility rules  $m_i \in \mathcal{M}$   
**5**   **If**  $m_i(\alpha, \tilde{t}_k) \neq T(l_{new})$   
**6**       Get location  $l \in \mathcal{L}^{(\alpha)}$  such that  $T(l) = T_{to}^{(i)}$   
**7**       **If**  $capacity(l)$  not reached  
**8**            $l_{new} = l$   
**9**       return  $l_{new}$

---

148 rules  $\mathcal{M} = \{m_1, \dots, m_{n_M}\}$  that have probabilistic components, which cause stochasticity  
 149 between simulations. These mobility rules include daily regular behavior like going to work  
 150 or school on weekdays, irregular behavior like occasionally attending a social event, and  
 151 behavior related to the infection state of an agent, e.g. going to hospital when having severe  
 152 symptoms. For  $\Omega$  containing all potential states of any agent and  $[\tilde{t}_0, \tilde{t}_{max}]$  denoting the  
 153 simulation period, a mobility rule  $m_i : \Omega \times [\tilde{t}_0, \tilde{t}_{max}] \rightarrow \mathcal{T}$  is given by

$$m_i(\alpha, \tilde{t}) = \begin{cases} T_{to}^{(i)}, & \text{if } \delta^{(i)}(\tilde{t}, \alpha) \delta_{T_{from}^{(i)}} [T(l^{(\alpha)}(\tilde{t}))] X_i = 1 \\ T(l^{(\alpha)}(\tilde{t})), & \text{else} \end{cases} \quad (1)$$

154 with  $T(l) \in \mathcal{T}$  denoting the type of location  $l$ ,  $X_i \in \{0, 1\}$  denoting a Bernoulli distributed  
 155 random variable with probability  $p_i$ , which has a different value for every mobility rule, and  
 156  $\delta_*[\cdot]$  denoting binary-valued functions defined as

$$\delta_{T_{from}^{(i)}} [T(l^{(\alpha)})] = \begin{cases} 1, & \text{if } T(l^{(\alpha)}) = T_{from}^{(i)}, \\ 0, & \text{else.} \end{cases} \quad (2)$$

157 Furthermore,  $T_{from}^{(i)}, T_{to}^{(i)} \in \mathcal{T}$  are location types and  $\delta^{(i)}(\tilde{t}, \alpha)$  are binary-valued functions  
 158 provided in Appendix A together with  $p_i$  for each mobility rule. The location  $l^{(\alpha)}$  of agent  
 159  $\alpha$  at time point  $\tilde{t}$ , with  $\tilde{t}$  in hours, is given by  $l^{(\alpha)}(\tilde{t}) = f(\alpha, \tilde{t})$  (see Algorithm 1), which is  
 160 evaluated at discrete time points  $\tilde{t}_0, \dots, \tilde{t}_{max}$  given a time step  $\Delta\tilde{t}$  and  $\tilde{t}_{k+1} = \tilde{t}_k + \Delta\tilde{t}$ .

### 161 2.2.2. Disease Progression

162 An agent  $\alpha$  has a time-dependent infection state  $s^{(\alpha)}(t)$  from a set of infection states  $\mathcal{S}$ . The  
 163 infection states used for this study are *Susceptible* ( $S$ ), *Exposed* ( $E$ ), *Non-symptomatically*

164 *Infected* ( $I_{ns}$ ), *Symptomatically Infected* ( $I_{sy}$ ), *Severely Infected* ( $I_{sev}$ ), *Critically Infected*  
 165 ( $I_{cri}$ ), *Recovered* ( $R$ ), and *Dead* ( $D$ ). Infection state  $I_{ns}$  includes infectious pre- and asymp-  
 166 tomatic agents and infection state  $I_{sev}$  includes agents requiring hospital treatment while  
 167  $I_{cri}$  includes agents requiring ICU treatment. We call an agent *infected* if it has infec-  
 168 tion state  $s^{(\alpha)}(t) \in \{E, I_{ns}, I_{sy}, I_{sev}, I_{cri}\}$  and *formerly infected* if  $s^{(\alpha)}(t) \in \{R, D\}$ . Tran-  
 169 sitions between infection states are stochastic and possible either through virus transmis-  
 170 sion ( $S \rightarrow E$ ) (see Section 2.2.3) or disease progression ( $E \rightarrow I_*$ ,  $I_* \rightarrow I_{**}$ ,  $I_{**} \rightarrow \{R, D\}$ )  
 171 (see Supplementary Fig. B.1(a)). For a (formerly) infected agent  $\alpha$ , the course of infection  
 172 is defined as  $\mathcal{I}^{(\alpha)} = \{(t_1^{(\alpha)}, s_1^{(\alpha)}), \dots, (t_{h_\alpha}^{(\alpha)}, s_{h_\alpha}^{(\alpha)})\}$  containing the time points  $t_1^{(\alpha)}, \dots, t_{h_\alpha}^{(\alpha)}$  at  
 173 which the agent changes or changed its infection state and the corresponding infection states  
 174  $s_1^{(\alpha)}, \dots, s_{h_\alpha}^{(\alpha)}$ . Hence,  $t_1^{(\alpha)}$  is the time point at which the agent is exposed and  $t_{h_\alpha}^{(\alpha)}$  the time  
 175 point at which the agent recovers or dies, i.e.  $s_{h_\alpha} \in \{R, D\}$ . The intermediate time values  
 176  $t_2^{(\alpha)}, \dots, t_{h_\alpha-1}^{(\alpha)}$  are the time points at which an agent changes to one of the infectious states of  
 177 the agent's individual course. The length  $h_\alpha$  of the course of infection differs between non-  
 178 symptomatic and (severe or critical) symptomatic courses and is therefore agent-dependent.  
 179 The stay times in infection states  $E, \dots, I_{cri}$  are log-normally distributed and the transitions  
 180  $E \rightarrow I_*$ ,  $I_* \rightarrow I_{**}$ ,  $I_{**} \rightarrow \{R, D\}$  between all infection states, apart from virus transmission  
 181 ( $S \rightarrow E$ ), are Bernoulli distributed; see Supplementary Table C.1 for the values of all disease  
 182 progression-related parameters used in the results section.

### 183 2.2.3. Disease Transmission

184 Infected agents can transmit the virus to susceptible agents if they are at the same location.  
 185 For a susceptible agent in location  $l$ , the waiting time until transmission is exponentially  
 186 distributed with rate  $\Lambda_l(t)$ . Assuming that agents change their locations only at discrete  
 187 time points,  $t_0, \dots, t_{max}$ , the number of agents at a location is constant in  $[t_k; t_{k+1})$  and  $\Lambda_l(t)$   
 188 is given by

$$\Lambda_l(t) = \sum_{\alpha \in l} \lambda_\alpha(t). \quad (3)$$

189 for  $t \in [t_k; t_{k+1})$  given in days. We use the casual notation  $\alpha \in l$  to iterate over the infected  
 190 agents at location  $l$  in the interval  $[t_k; t_{k+1})$ . The agent-dependent rate  $\lambda_\alpha(t)$  is given by the  
 191 infectiousness curve described in Section 2.3, Eq. (8). The location-specific infection rate (3)  
 192 builds on the assumption of homogeneous mixing within the location. If the waiting time  
 193 until transmission is longer than the time until the susceptible agent leaves location  $l$ , no  
 194 transmission occurs. Hence, for a fixed time step  $\Delta t = t_{k+1} - t_k$  given in days, the probability  
 195 that a susceptible agent at location  $l$  gets exposed is

---

**Algorithm 2:** ABM Simulation.

---

```
1 Input: Start time  $t_0$ , end time  $t_{max}$ , time step  $\Delta t$  in days, parameters as described
   above
2 Initialize locations
3 Create desired number of locations for every type
4 Set capacity and maximum number of contacts
5 Initialize agents
6 Set age group
7 Assign locations and set initial location
8 Set initial infection state and sample course of infection for initially infected
9 Set  $t = t_0$ 
10 While  $t < t_{max}$ 
11   Forall agents  $\alpha$ 
12     If  $s^{(\alpha)} = S$ 
13       Calculate  $\Lambda_{l^{(\alpha)}}(t)$ 
14       Draw waiting time  $v \sim Exp(\Lambda_{l^{(\alpha)}}(t + \frac{\Delta t}{2}))$ 
15       If  $v \leq \Delta t$ 
16         Sample course of infection  $\mathcal{I}^{(\alpha)}$ 
17       Else
18         continue
19     Forall mobility rules  $m_i$ 
20       If  $T(l^{(\alpha)}) \neq m_i(\alpha, 24 \cdot t)$  and capacity( $f(\alpha, 24 \cdot t)$ ) not reached
21          $l^{(\alpha)} = f(\alpha, 24 \cdot t)$ 
22         break
23    $t = t + \Delta t$ 
```

---

$$1 - e^{-\Delta t \int_{t_k}^{t_{k+1}} \Lambda_l(t) dt}. \quad (4)$$

196 *2.3. Modeling Viral Load, Infectiousness and Shedding*

197 The viral load of individual patients determines their infectiousness and shedding. Here, we  
198 model viral shedding using established models [20, 21]. The viral load for an agent  $\alpha$  in RNA  
199 copies per swab on the  $\log_{10}$  scale at a given time  $t$  in days (see Supplementary Fig. B.2, left)  
200 is defined as

$$v_\alpha(t) = \begin{cases} \frac{v_{\max}^{sy}}{\tau_E + \tau_{I_{ns}}} \cdot (t - t_E), & \text{if } t \in [t_E, t_{v_{\max}}] \\ v_{\max} + \frac{v_{\max}}{t_{R/D} - t_{v_{\max}}} \cdot (t - t_{v_{\max}}), & \text{if } t \in (t_{v_{\max}}, t_{R/D}] \\ 0, & \text{otherwise} \end{cases} \quad (5)$$

201 with  $t_E$ ,  $t_{v_{\max}}$ , and  $t_{R/D}$  denoting the times in days of virus exposure, maximal viral load, and  
 202 recovery/death, respectively. The time points are agent specific, with  $t_E = t_1^{(\alpha)} \leq t_{v_{\max}} \leq$   
 203  $t_{R/D} = t_{h_\alpha}^{(\alpha)}$ . As the infection state trajectories are sampled at the time point of exposure,  
 204  $t_{R/D}$  is readily available.

205 We assume that symptomatically infected agents reach the peak viral load the moment they  
 206 show symptoms, while agents not showing symptoms reach the peak in the middle of their  
 207 infection period. Furthermore, we assume agents that share the same duration  $\tau_E + \tau_{I_{ns}}$  also  
 208 share the same linear increase until  $t_{v_{\max}}$ . This yields for the variables  $t_{v_{\max}}$  and  $v_{\max}$ :

$$t_{v_{\max}} = \begin{cases} t_E + \tau_E + \tau_{I_{ns}}, & \text{if } I_{sy} \in \{s_1^{(\alpha)}, \dots, s_{h_\alpha}^{(\alpha)}\} \\ t_E + 0.5 \cdot (t_{R/D} - t_E), & \text{else} \end{cases}$$

$$v_{\max} = \begin{cases} v_{\max}^{sy}, & \text{if } I_{sy} \in \{s_1^{(\alpha)}, \dots, s_{h_\alpha}^{(\alpha)}\} \\ \frac{v_{\max}^{sy}}{\tau_E + \tau_{I_{ns}}} \cdot (t_{v_{\max}} - t_E), & \text{else} \end{cases}$$

209 where  $v_{\max}^{sy}$  is the peak viral load given in  $\log_{10}$  RNA copies per swab for symptomatic  
 210 infections (see Supplementary Table C.2 for the value of this and all other parameters relevant  
 211 to viral shedding).

212 Following the observation of Jones et al. [20], we model the shape of an agent  $\alpha$ 's shedding  
 213 by a sigmoid function of their viral load, i.e.,

$$\zeta_\alpha(t) = \frac{1}{1 + \exp(-(a + b \cdot v_\alpha(t)))} \quad (6)$$

214 with shape parameters  $a, b > 0$ . As in [20], since there is no information about when shedding  
 215 starts after exposure, we make the assumption that shedding is zero or close to it as long as  
 216 the agent is still in the Exposed state. Therefore we introduce a time shift of  $\tau_{shift} = 0.6 \cdot \tau_E$ .  
 217 Thus, the scaled and shifted shedding curve for an agent  $\alpha$  is given by:

$$\gamma_\alpha(t) = \begin{cases} \kappa_\gamma \cdot \zeta_\alpha(t - \tau_{shift}), & \text{if } t \in [t_E + \tau_{shift}, t_{R/D}] \\ 0, & \text{otherwise} \end{cases} \quad (7)$$

218 where  $\kappa_\gamma$  is a scaling factor that translates  $\zeta_\alpha(t - \tau_{shift})$  into an RNA shedding rate. The  
 219 RNA shedding into the sewage network is the number of RNA copies shed in total per day  
 220 and has to be normalized by the water flushed into the wastewater system to receive a unit  
 221 of copies per liter.

222 Similarly, the corresponding unitless infectiousness curve for agent  $\alpha$  at time point  $t$  (given  
 223 in days) (see Supplementary Fig. B.2, right) is given by

$$\lambda_\alpha(t) = \begin{cases} \kappa_\lambda \cdot \zeta_\alpha(t - \tau_{shift}), & \text{if } t \in [t_E + \tau_{shift}, t_{R/D}] \\ 0, & \text{otherwise} \end{cases} \quad (8)$$

224 with  $\kappa_\lambda$  translating  $\zeta_\alpha(t - \tau_{shift})$  into a transmission rate (see Section 2.2.3).

#### 225 2.4. Modeling the Sewage System and its Hydrodynamics

226 We use a comprehensive model of a wastewater network to simulate the sewage flow and  
 227 reactive transport of dissolved chemical substances in wastewater while avoiding simplifica-  
 228 tions and incorrect interpretations. In this model, a sewer system is represented as a directed  
 229 acyclic graph defined by  $n$  edges  $\mathcal{E} = \{e_1, \dots, e_n\}$  and  $m$  nodes  $\mathcal{N} = \{n_1, \dots, n_m\}$ . The edges  
 230 represent sewage pipes and the nodes represent junctions as well as entry and exit points.  
 231 Edges and nodes are characterized by several parameters, including total volume and height.  
 232 The state of the system is the amount of water contained in the edges and nodes, its flow  
 233 rate, and the concentrations of the relevant substances. The simulation of water inflow to  
 234 the system is based on two phenomena: hydraulic surface runoff during precipitation events  
 235 and water usage of industry and citizens.

236 At their core, the hydrodynamic calculations are based on the Saint-Venant Equation [16].  
 237 The equation assumes one-dimensional flows in open channels and mass and momentum  
 238 conservation, which yields

$$\frac{1}{g} \frac{\partial v}{\partial t} + \frac{v}{g} \frac{\partial v}{\partial x} + \frac{v}{g \cdot A} q + \frac{\partial h}{\partial x} + \frac{\lambda}{4 \cdot R} \frac{v|v|}{2g} = 0, \quad (9)$$

239 with flow velocity  $v$  in  $\frac{\text{m}}{\text{s}}$ , time  $t$  in s, gravitational acceleration  $g$  in  $\frac{\text{m}}{\text{s}^2}$ , vertical position  
 240 along the pipe  $x$  in m, cross-sectional flow area  $A$  in  $\text{m}^2$ , lateral inflow corresponding to the  
 241 precipitation of a specified time interval  $q$  in  $\frac{\text{m}^3}{\text{s}}$ , water levels  $h$  in m, pipe friction coefficient  
 242  $\lambda$  (unitless) and hydraulic radius  $R$  in m (i.e.  $\frac{A}{\text{Circumference}}$ ).

Replacing the differential operators with differential quotients for specified time points  $t_1 < t_2$

and locations  $x_1 < x_2$  yields

$$\frac{\partial v}{\partial t} \rightarrow \frac{v(t_2, x) - v(t_1, x)}{t_2 - t_1}, \quad (10)$$

$$\frac{\partial v}{\partial x} \rightarrow \frac{v(t, x_2) - v(t, x_1)}{x_2 - x_1}, \quad (11)$$

$$\frac{\partial h}{\partial x} \rightarrow \frac{h(t, x_2) - h(t, x_1)}{x_2 - x_1}, \quad (12)$$

for  $t \in [t_1, t_2]$  and  $x \in [x_1, x_2]$ . By interpreting  $\Delta x = x_2 - x_1$  as the length of an edge of the wastewater network, Eq. (9) after rearrangement becomes a quadratic equation of the form

$$av(t, x)^2 + bv(t, x) + c = 0, \quad (13)$$

where

$$a = \text{sign}(v(t_1, x)) \cdot \frac{\lambda}{8R},$$

$$b = \frac{1}{t_2 - t_1} + \frac{v(t, x_2) - v(t, x_1)}{\Delta x} + \frac{q}{A} \quad \text{and}$$

$$c = -\frac{v(t_1, x)}{t_2 - t_1} + \frac{h(t, x_2) - h(t, x_1)}{\Delta x} g.$$

243 The quadratic equation has two complex solutions, where the flow velocity  $v$  is equal to the  
 244 real part of those solutions:

$$v(t, x) = \text{RE} \left( -b + \frac{\sqrt{b^2 - 4ac}}{2a} \right). \quad (14)$$

245 Using this solution and the boundary conditions  $v(t, x_1)$ ,  $v(t, x_2)$ ,  $h(t, x_1)$ , and  $h(t, x_2)$ , as well  
 246 as the initial condition  $v(t_1, x)$ , a solution of the flow velocity can be calculated for arbitrary  
 247 time points and edges of the network system. The state of the nodes of the system define the  
 248 boundary and initial conditions. Based on the solutions from Eq. (9) for edges connected to  
 249 a node, the in- and outflow to the node is given for each edge. At the center of the node, the  
 250 sum of in- and outflow equals zero (mass conservation). Based on this assumption, the flow  
 251 rates and heights at the edge borders can be calculated.

252 While  $\Delta x$  can be defined based on the length of an edge,  $\Delta t = t_2 - t_1$  has to be chosen carefully.  
 253 A too large value of  $\Delta t$  will yield inaccurate numerical solutions, while a too small value will  
 254 yield unnecessarily high computation times. A complex solution of Eq. (13) with an imaginary  
 255 component larger than zero indicates the transition to an oscillatory state. To ensure a  
 256 meaningful numerical solution,  $\Delta t$  is chosen to be smaller than the corresponding oscillation  
 257 period. Further considerations like the maximum total change of volume provide an equation  
 258 to set  $\Delta t$  for each iteration of the numerical solution scheme, such that stable solutions of

259  $v$  are ensured even for extreme hydraulic scenarios (see [41]). By combining Eq. (13) with  
260 other known physical principles, e.g. energy loss along a pipe (using the Prandtl-Colebrook  
261 equation) and energy loss due to inelastic collisions in manhole structures (according to the  
262 Borda-Carnot equation), the simulation precision is further refined.

263 Based on the calculated flow velocities and other time-varying edge state variables, the sub-  
264 stance concentration per location and time point can be calculated. Viral loads generated  
265 by agents of the ABM enter the sewer system as concentrations in the respective amount of  
266 domestic wastewater generated for every time step of the model simulation, at the location  
267 the agent currently occupies. Viral fragments are then transported through the system ac-  
268 cording to the pre-calculated flow rates, potentially taking chemical reactions in the form of  
269 viral decay into account. The outputs of the hydraulic simulation are time- and location-  
270 dependent concentration curves. The time step for the viral load calculation is chosen prior  
271 to the calculations and a suitable value depends on the specifics of the viral decay dynamics,  
272 where faster changing dynamics suggest choosing a smaller time step.

273 After defining the wastewater network, its connected surfaces and corresponding runoffs,  
274 as well as substance characteristics, the simulation proceeds in two steps (see Supplemen-  
275 tary Fig. B.3). First, the flow velocities and volumes are calculated with a numerical solver.  
276 Secondly, the viral load over time is simulated.

277 For the numerical simulation, we use the urban water management modeling and simulation  
278 environment ++SYSTEMS, developed by the company tandler.com GmbH. Utilizing the  
279 mathematical principles described above, ++SYSTEMS with its backend and calculation  
280 kernel DYNA forms a fully dynamic, geospatial modeling and management software for waste-  
281 and rainwater (individually or combined) sewer systems. Details on the implementation are  
282 available in [41].

### 283 **3. Results**

#### 284 *3.1. Demonstrator Setup*

285 To address open questions and challenges related to the interpretation of wastewater-baser  
286 surveillance data, we performed a simulation study, which allows us to evaluate counterfac-  
287 tual scenarios without missing data or data uncertainty. To this end, we developed a syn-  
288 thetic, yet realistic model of a city neighborhood and corresponding sewer system (Fig. 2);  
289 we then traced infectious disease outbreaks in this controlled setting using our sequence of  
290 three modules, from the MEmilio-based infection dynamics model to the shedding model to  
291 the ++SYSTEMS-based wastewater dynamics model. The synthetic neighborhood used in  
292 our study contains residential, recreational, university, mixed shopping and business, and  
293 mixed residential and industry surface areas. It is populated by at least 838 agents, whose

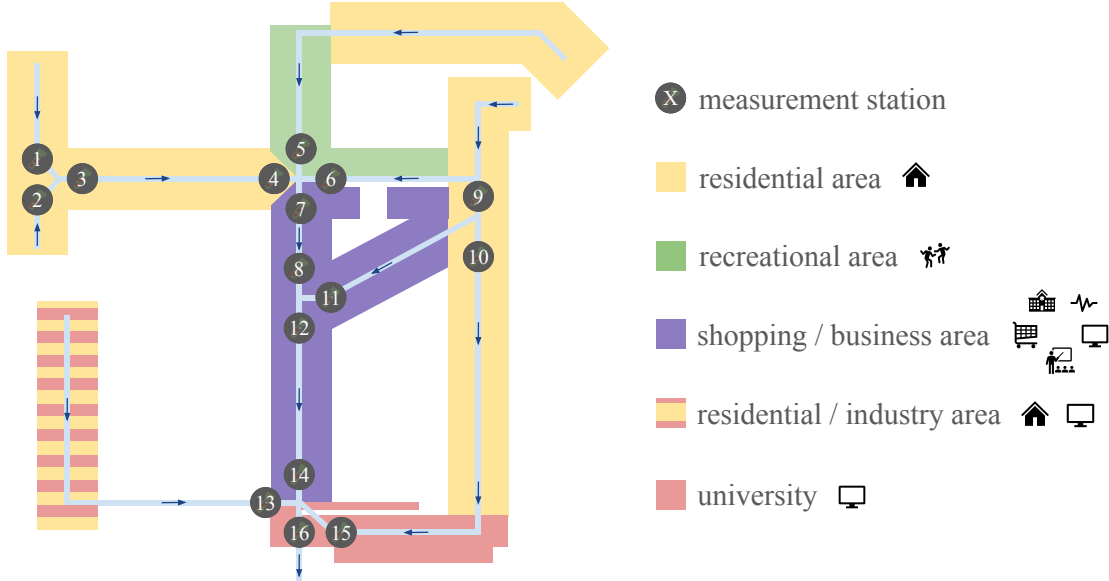

Figure 2: **Demonstrator Neighborhood.** The synthetic neighborhood on which we base our simulation study constitutes areas of different types. Flow rates and substance concentrations are simulated for 16 different measurement stations.

294 simulated movements, both on weekdays and weekends, remain completely inside the model.  
 295 The model’s synthetic sewer system was designed such that realistic sewer conditions are  
 296 maintained during all simulation scenarios: No sanitary sewer overflow occurs, all pipes are  
 297 at a maximum of 90% of their hydraulic capacity, and gravity flow is realized throughout the  
 298 whole system.

299 Following the official reporting standards for COVID-19 cases in Germany, we considered  
 300  $n_A = 6$  age groups ranging from small children to seniors. Households – i.e. groups of agents  
 301 that share their assigned *Home* location – were created for each residential area based on its  
 302 total number of agents. We considered 1- to 5-person households. Every household had at  
 303 least one member of the adult age groups  $\mathcal{A} \in \{3, 4, 5, 6\}$  (age groups 1 and 2 correspond to  
 304 early childhood or adolescence). The household distribution was motivated by the German  
 305 micro census 2019 [40]. Non-*Home* locations also had to be assigned to the agents. A location  
 306 of a given type was assigned to an agent from an equal distribution of all locations of that  
 307 type. Every agent was assigned a location of type *Shop*, *Recreation*, *Hospital*, and *ICU*, while  
 308 a *School* location was only assigned to agents in age group 2 and a *Work* location only to  
 309 agents in age groups 3 and 4. Finally, the initial infection states were allotted to agents  
 310 by independent and identical sampling from the initial infection state distribution (0.2%  $E$ ,  
 311 0.5%  $I_{ns}$ , 0.29%  $I_{sy}$ , and 0.01%  $I_{sev}$ ), i.e. on average, 1% of the modeled agents were initially  
 312 infected.



313 The integrated model contains various parameters describing characteristics of the virus,  
314 which allows for the modeling of a broad spectrum of communicable respiratory or, in particu-  
315 lar, COVID-19-like diseases. We implemented the simulation using wild-type COVID-19-like  
316 parameters based on [25], [22], and [21]. The ++SYSTEMS files defining the exact shape  
317 of the sewage system, area characteristics, etc. are provided as supplementary material for  
318 each experiment and in the subsequent sections we only mention settings that differ between  
319 the experiments. An overview of the ABM parameters as well as the experiment-specific  
320 parameters is provided in Appendix C.

321 Since most cluster systems are based on Linux, we facilitate the modules using Ubuntu.  
322 ++SYSTEMS is a Windows program, hence, we created a headless virtual machine, which  
323 can be started and navigated through via a command line interface. One ABM simulation  
324 takes about 3.8 minutes on one core; one ++SYSTEMS simulation takes about 3-4 minutes  
325 on 8 cores.

### 326 *3.2. Non-trivial relation of prevalence in catchment area and measurement concentrations*

327 For a first assessment of the process dynamics, we considered the total number of upstream  
328 agents, the number of upstream infected agents, and the upstream RNA influx for a single  
329 measurement station for an outbreak scenario (Fig. 3). The model simulation reveals that  
330 the number of agents in a particular catchment area changes over the course of a day and  
331 from weekdays to weekends, primarily due to the agents' participation at work, school, or  
332 recreational events. This mobility results in substantial changes to the upstream RNA influx.  
333 The measured virus levels are additionally influenced by the sewage volume, which itself  
334 depends on the total number of agents in the catchment area. Since agents return home from  
335 school, etc. at slightly different time points, the virus levels can show large deviations from  
336 an average value for only a few simulation minutes. Overall, the model highlights the impact  
337 of mobility on wastewater-based surveillance results.

### 338 *3.3. Characteristics of catchment area influence dynamics*

339 Establishing a monitoring system for wastewater is time- and energy-consuming. Legal per-  
340 mits for measurements and access to the locations have to be organized, the sampling stations  
341 have to be set up, and the samples have to be collected and transported to laboratories for  
342 further analysis on a regular basis. Hence, it is not surprising that even established monitor-  
343 ing networks have limited sampling locations and time schedules, often reporting 1-3 values  
344 per week and neighborhood or city. This renders the optimal placement of sampling locations  
345 and the selection of appropriate sampling strategies critical. Here, we investigated the impact  
346 of the choice of sampling location using our fine-grained integrated model, as a corresponding  
347 real-world study would be infeasible.

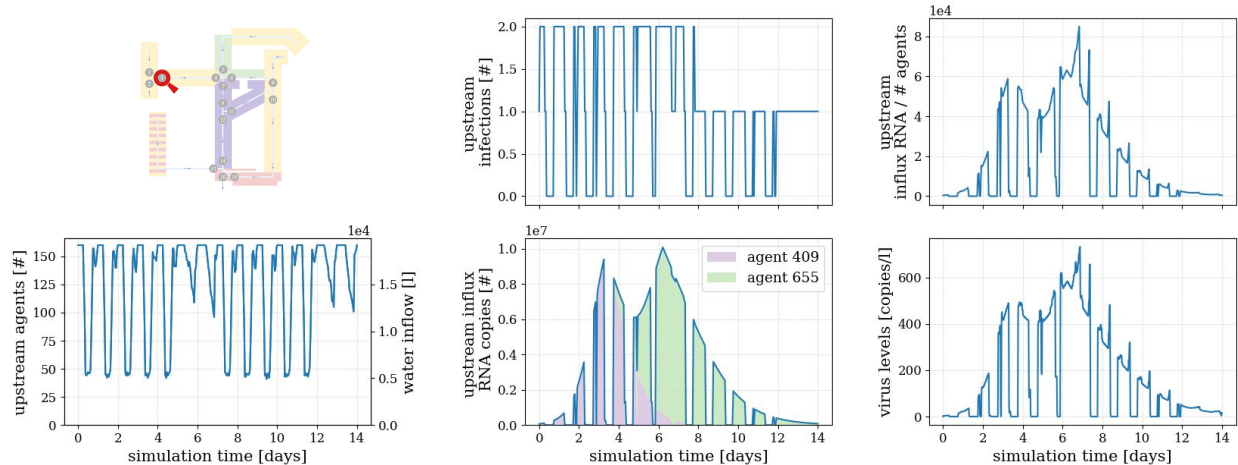

Figure 3: **Exemplary (processed) Simulation Output.** Output for viral measurements in a scenario without precipitation or viral decay at measurement station 3.

348 We considered 16 possible sampling location in the synthetic neighborhood. These sampling  
 349 locations correspond to catchment areas with a broad spectrum of different properties: First,  
 350 the corresponding catchment areas of a sampling station differ with respect to the area type,  
 351 i.e. primarily include residential areas (stations 1, 2, 3, 4, 9, 10), recreational areas (station 6),  
 352 shopping/business areas (station 11), or mixed areas. Second, the catchment areas differ with  
 353 respect to their sizes. Further upstream locations (e.g. station 1) summarize the dynamics  
 354 of a smaller area than downstream locations (e.g. station 16). In this neighborhood, sewer  
 355 flow times to the furthest downstream stations are at most around 80 minutes.

356 To assess the information content of the wastewater-based surveillance data, we conducted  
 357 a comprehensive simulation study. A total of 250 simulations of the proposed integrated  
 358 model were used to account for the inherent stochasticity of infection processes; see Supple-  
 359 mentary Fig. B.4 for a visualization of the prevalence over time. Assessment of the simulation  
 360 results (Fig. 4) shows that sampling locations downstream of residential areas (e.g. station 1)  
 361 produce reproducible daily and weekly trends in the measured virus levels. In contrast, sam-  
 362 pling locations downstream of regions containing recreational areas (e.g. station 6 & 11) show  
 363 more variability between simulations. Sampling stations near the endpoint of the network,  
 364 which have large catchment areas (e.g. station 16) and would in practice fall closer to a  
 365 wastewater treatment plant, yield smoother curves with no or less extreme daily and weekly  
 366 trends.

367 To evaluate how representative the viral load in the wastewater is at the different sampling  
 368 locations, we computed the temporal cross-correlations between the RNA copies per liter in  
 369 wastewater samples and (i) the true overall prevalence (Fig. 5(a), top) and (ii) the true viral  
 370 shedding into the wastewater (Fig. 5(a), bottom). We found the highest cross-correlation

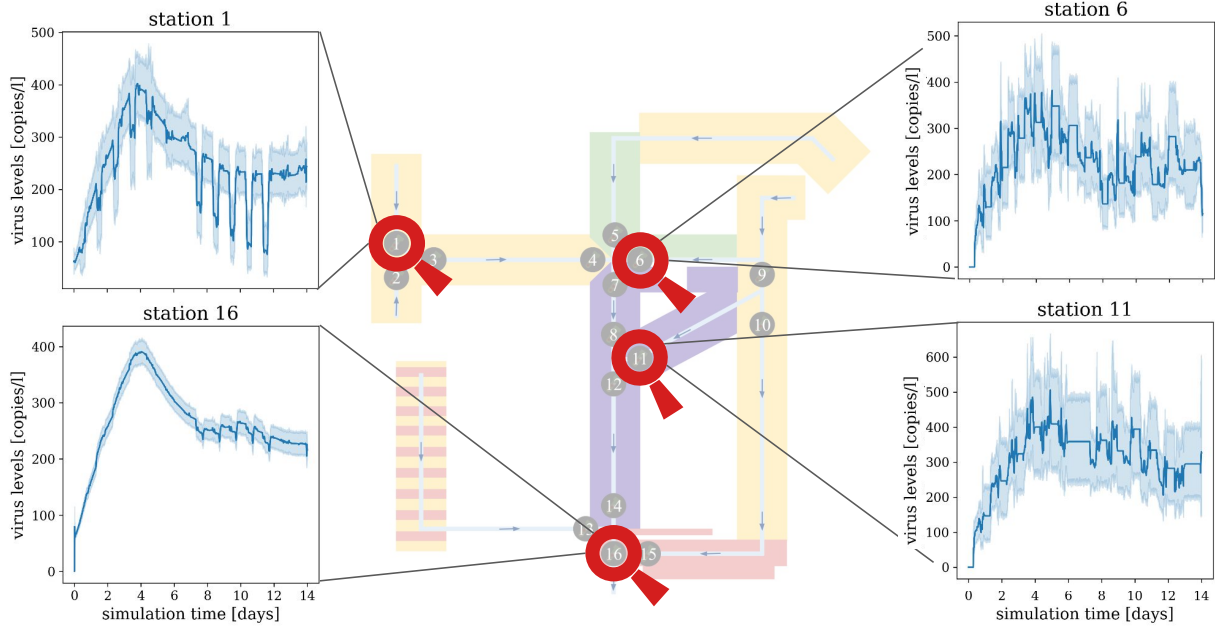

Figure 4: **Variability of Measurements for Sampling Locations.** Comparison of virus levels in wastewater at different sampling locations. Shown are the mean (solid line) and 95% confidence intervals (shaded area) of the 250 simulation results per location.

371 values are reached for the stations with larger catchment areas, in particular stations 7, 8,  
 372 12, 14, and 16. The correlation coefficient is as high as 0.56 for the true prevalence and  
 373 0.90 for the amount of virus shed. These correlation coefficients are surprisingly high given  
 374 the variability between the (stochastic) simulation runs (Fig. 5(b)). Indeed, if the initial  
 375 infections were not distributed randomly, the pattern would be more pronounced and large  
 376 catchment areas would be even more beneficial (results not shown).

377 The integrated model also shows that the temporal cross-correlation is generally higher when  
 378 a negative time lag is applied to the (true) prevalence data. Since a high virus concentration  
 379 in the wastewater indicates that the level of infectiousness across the population is also high  
 380 and that a wave of new infections will therefore likely soon follow, the virus level at sampling  
 381 stations with large catchment areas was most predictive for the prevalence 10 to 40 hours  
 382 later. This time lag likely depends on the incubation time of the virus and its replication rate  
 383 in the human body. As the reported prevalence is delayed compared to the true one, the time  
 384 shift observed in practice will be even larger (Fig. 5(c)). Overall, our results suggest that  
 385 in the absence of complicating factors such as viral decay – the impact of which would be  
 386 limited in this particular sewer due to the relatively short travel times – choosing a wastewater  
 387 sampling location far enough downstream to be unaffected by daily and weekly trends may  
 388 help predict increases in prevalence before they occur.

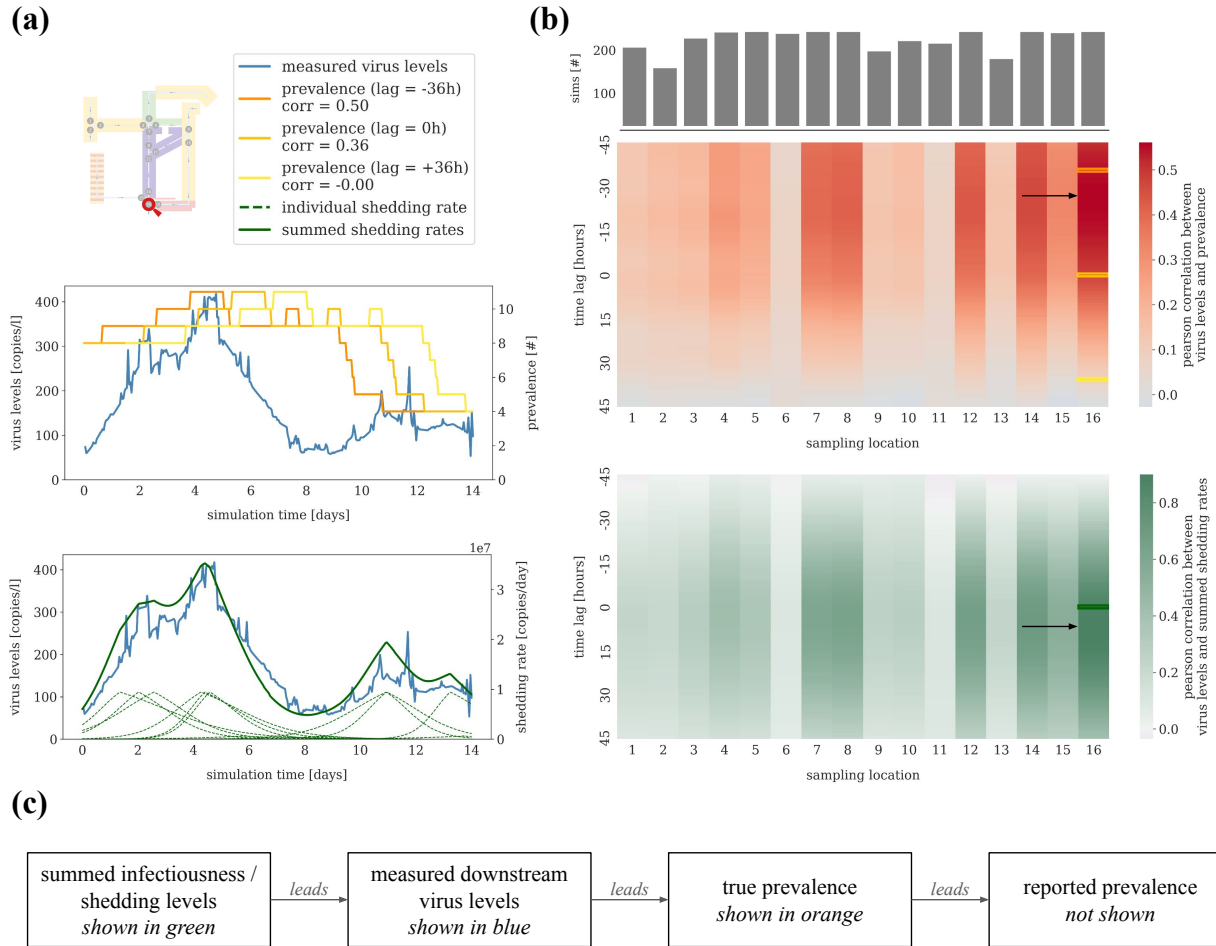

**Figure 5: Cross-Correlations Between Wastewater-based Surveillance Data and Prevalence.** (a) Trajectory of the wastewater viral load in RNA copies per liter for sampling location 16 compared to the total true prevalence shifted with lags -36, 0, and 36 hours (top), or to the summed shedding rates across all prevalent infections (bottom), for one simulation. (b) Pearson cross-correlations between RNA copies per liter in wastewater measured at the 16 different locations and the total true prevalence (top) or the summed shedding rates (bottom), averaged over 250 simulations. The time lag describes the shift in prevalence or shedding rates. The maximum cross-correlations are marked with black arrows. The upper bar plot indicates how many simulations were used to calculate the correlations for each sampling location; simulations in which no virus was ever measured at a particular location were removed. (c) Schematic illustrating the temporal relationship between the different outcomes.

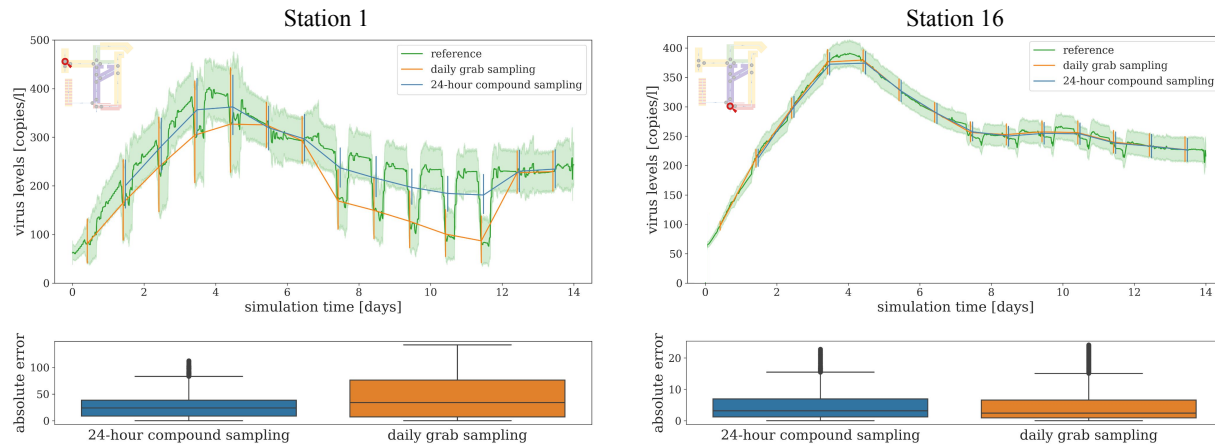

Figure 6: **Sampling Protocols.** RNA concentration in wastewater with 24-hour compound sampling or daily grab sampling (at 10:00 am each day) compared to the reference scenario (grab sampling every three minutes). Shown are the mean (solid lines) and 95% confidence intervals (shaded areas or error bars) of the 250 simulation results for stations 1 and 16 along with the distribution of the absolute error between the linearly interpolated average results for 24-hour compound or daily grab sampling and the average results for the reference scenario.

389 *3.4. Temporal sampling design has minimal impact on wastewater monitoring results if sam-*  
 390 *ples are taken downstream*

391 The sampling design differs between wastewater monitoring studies. The most common  
 392 setups are one grab sample collected per day of interest (usually during the morning flush)  
 393 or a 24-hour compound sample based on a collection of one sample per hour [23]. To assess  
 394 the impact of these sampling strategies and their benefits and disadvantages, we simulated  
 395 both strategies using the same setup as in the previous section (in which we assumed the  
 396 use of discrete grab samples every three minutes). The analysis of the simulation results  
 397 indicates that in the case of a clear daily trend, the choice of sampling protocol can influence  
 398 the results and e.g. lead to systematically biased estimates of the general dynamics (Fig. 6).  
 399 Stations further downstream are less influenced by daily and weekly agent movement patterns  
 400 (see Section 3.3) and different sampling protocols yield comparable results, i.e. a maximal  
 401 cross-correlation of 0.56 between measured viral load and time-lagged prevalence.

402 *3.5. Rain influx impacts reliability of wastewater monitoring results in a nonlinear manner*

403 Rain influences the amount of fluid in the wastewater system, the fluid velocity, and the  
 404 concentration of particles in the overall wastewater. Yet, many currently available models  
 405 simply disregard rain events and the associated dataset. This approach results in a loss of  
 406 information, and – as it is unclear how long-lasting the effects of rain might be – might  
 407 still not be particularly reliable. To provide a fine-grained analysis of the impact of rain

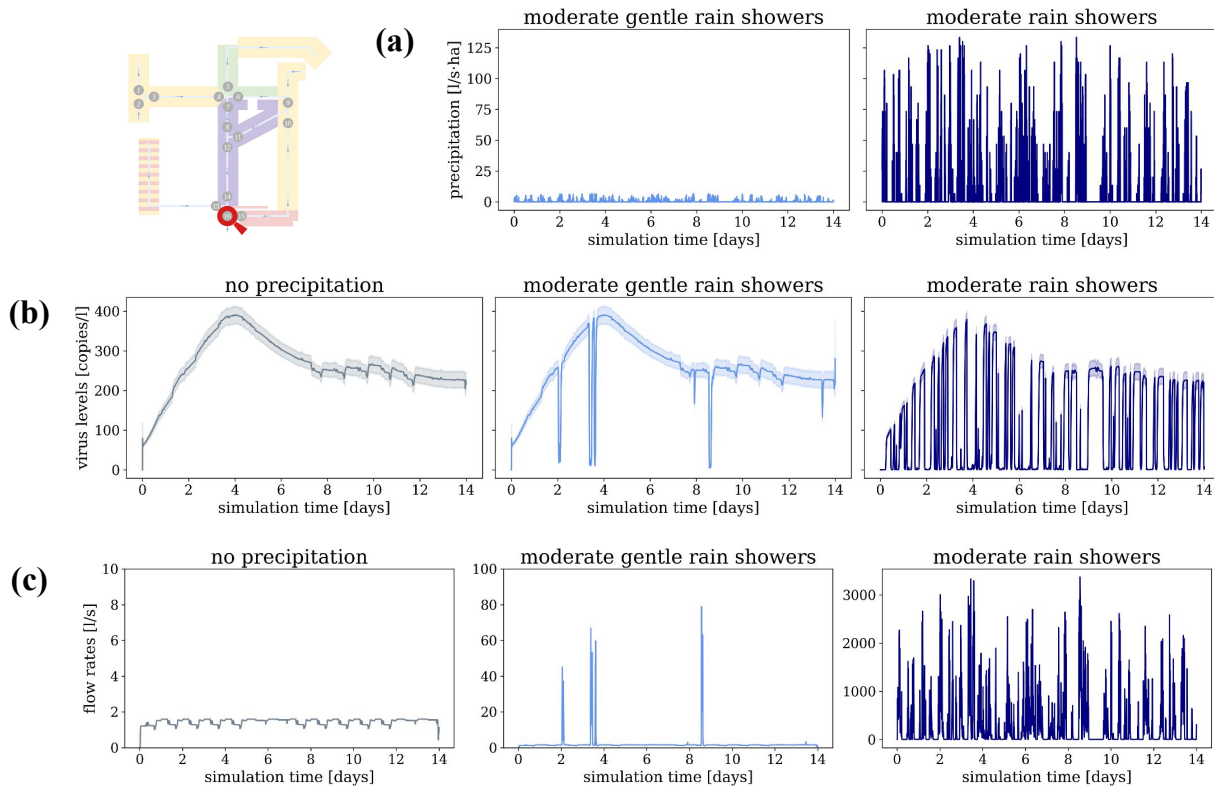

Figure 7: **Influence of Precipitation.** Comparison of different rain scenarios (no precipitation, moderate gentle rain showers, and moderate rain showers) at sampling location 16 visualizing (a) the precipitation, (b) the RNA concentration in wastewater in copies per liter, and (c) the flow rates in liter per second.

408 on wastewater measurements, we simulated three scenarios: *No precipitation* (which was  
 409 also used for the previous results), *moderate gentle rain*, and *moderate rain* showers. Here,  
 410 we followed the rain intensity definitions from Germany’s National Meteorological Service  
 411 (DWD) [42]: “moderate gentle rain” means between 0.1 mm and 0.5 mm in 60 min and  
 412 “moderate rain” means between 2.5 mm and 10.0 mm in 60 min.

413 In order to run simulations with a two-week duration with realistic time-dependent rain inten-  
 414 sities, a suitable two-week period from a synthetic rain series [3] generated by the Bavarian  
 415 Environment Agency (LfU) was used. The intensities were adapted such that the above-  
 416 mentioned rain definition criteria were met. As a result, the two rain scenarios only differ in  
 417 their intensities; the temporal profile of rain peaks is the same for both scenarios, ensuring  
 418 comparability.

419 Due to effects like evaporation, the filling of water basins (e.g. uptake by the ground), and  
 420 permeable and non-permeable surface fractions, only a small proportion of rainfall ends up in  
 421 the hydraulic system and a minimum amount of precipitation is necessary to have an effect at  
 422 all. This net hydraulic surface runoff increases the water volume and hence, can increase the

423 flow rates and reduce the concentration of RNA in wastewater significantly (Fig. 7). RNA  
 424 copies per liter close to zero correspond to a proportion close to 1 of rainwater in the sewage.  
 425 If the flow rates increase by several orders of magnitude for a short amount of time (as is, e.g.  
 426 the case in the moderate gentle rain scenario presented here), the sewage containing large  
 427 fractions of rainwater is flushed out of the system very quickly, yielding a state comparable  
 428 to the non-precipitation state afterwards. The moderate gentle rain scenario showcases that  
 429 there is a minimum amount of precipitation necessary to have an effect on the flow rates  
 430 and virus concentrations. The moderate rain scenario highlights how precipitation influences  
 431 measurements if the rainwater inflow to the sewage is larger than zero for several neighboring  
 432 time steps.

433 The analysis of the influence of precipitation events on measurements showcases the impor-  
 434 tance of normalizing observations to compare measurements of precipitation and dry weather  
 435 time points. For more details on normalization strategies, see the results presented in Sec-  
 436 tion 3.7.

### 437 3.6. Virus Characteristics

438 The interplay of virus and host immune response determine virus shedding and transmission  
 439 and, hence, the prevalence and influx of virus particles into the wastewater system. Yet, the  
 440 virus particles are not necessarily stable but can decay. For SARS-CoV-2, estimates of the  
 441 the 90% reduction times in wastewater at ambient temperatures range between 5.5 and 28.8  
 442 days [5, 13, 1]. As the sewer of the synthetic neighborhood has a relatively short maximum  
 443 flow time, we have been able to reasonably neglect viral decay so far. We now assume that  
 444 our virus of interest has much faster virus reduction times than SARS-CoV-2, in order to  
 445 study the impact of rapid decay processes on wastewater monitoring results and their relation  
 446 to prevalence. To this end, we compare three different temporal models for the decay rate  $v$   
 447 of [RNA] (in copies per liter) in wastewater:

448 • no decay:  $v = 0 \frac{\text{copies}}{l \cdot s}$

449 • linear decay:  $v = k_1$ , where  $k_1 = \begin{cases} -0.1 \frac{\text{copies}}{l \cdot s}, & \text{for [RNA]} > 0 \\ 0 \frac{\text{copies}}{l \cdot s}, & \text{for [RNA]} \leq 0 \end{cases}$

450 • exponential decay:  $v = k_2 \cdot [\text{RNA}]$ , where  $k_2 = -1 \cdot 10^{-3} \frac{1}{s}$  (corresponding to a half-life  
 451 of about 690 seconds or about 0.2 hours)

452 The *no decay* scenario assumes that viral particles remain intact and serves as a baseline for  
 453 understanding the upper bound and comparing it to more realistic models. The *linear decay*  
 454 scenario is motivated by a potential interaction between a virus and a certain enzyme or



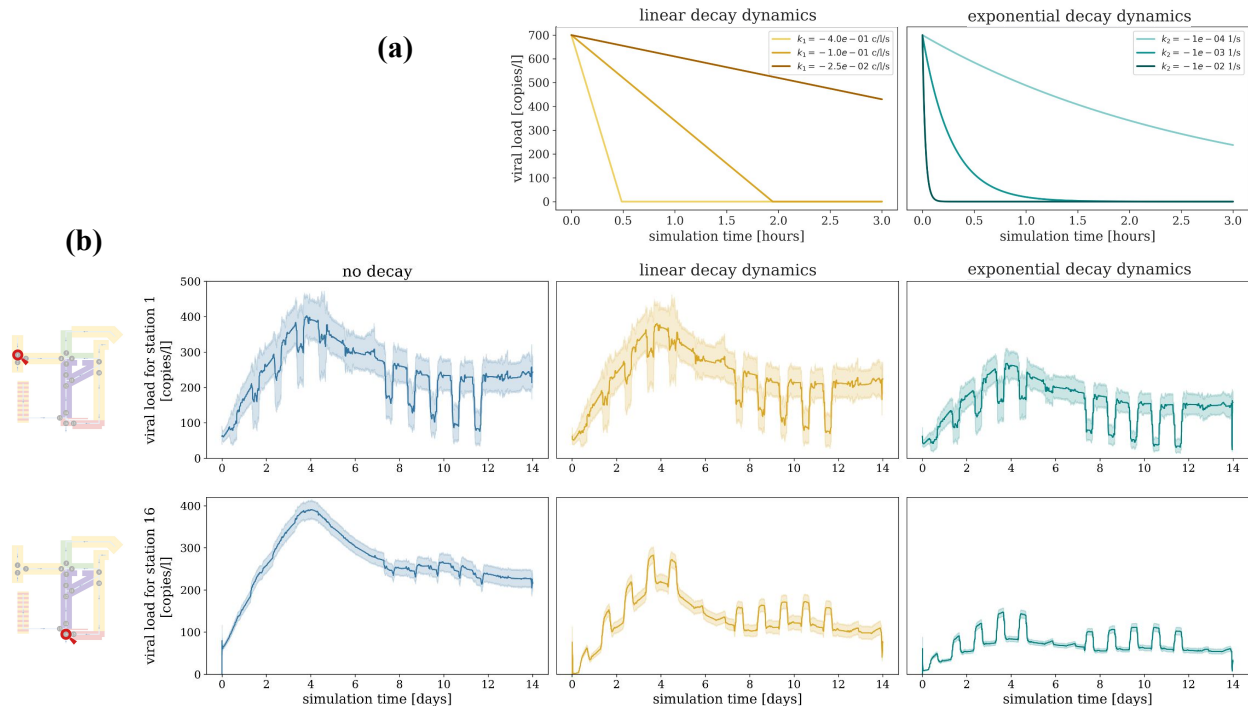

Figure 8: **Viral Decay Dynamics.** (a) Illustration of the effects of linear decay (left) vs. exponential decay (right) with 3 example parameter settings each on a starting virus concentration of 700 copies per liter. (b) The virus concentration measured at station 1 (top) and station 16 (bottom) over time without rain and with no decay (left), linear decay with  $k_1 = -0.1 \frac{\text{copies}}{\text{l}\cdot\text{s}}$  (center), and exponential decay with  $k_2 = -1 \cdot 10^{-3} \frac{1}{\text{s}}$  (right).

455 environmental condition in the wastewater that degrades the virus at constant rate (e.g. be-  
 456 cause its abundance is limited). The *exponential decay* scenario captures the most commonly  
 457 observed decay dynamics, translating to a constant decay probability per unit time.

458 We analyzed the simulation results for the three decay scenarios, without precipitation, at  
 459 two sampling locations: 1 and 16 (Fig. 8). At the upstream station 1, the measured viral  
 460 loads are proportionally slightly lower for the linear decay setting and considerably lower  
 461 for the exponential decay setting compared to the no decay setting, since for the relevant  
 462 concentrations, exponential decay with a half-life of 690 seconds is considerably faster than  
 463 linear decay of  $-0.1$  copies per liter per second. However, the general shape of the viral  
 464 load trajectory at station 1 over time is unaffected by the decay setting: For all three decay  
 465 scenarios, there are periodic dips in the virus level on weekdays and a defined peak around the  
 466 fourth day. At the downstream station 16, not only are the measured viral loads lower for the  
 467 linear and especially the exponential decay settings, but the shape of the viral load trajectory  
 468 over time is also affected, with defined peaks during weekday daytime periods. When the viral  
 469 decay is non-negligible, virus copies shed from the upstream residential areas tend to decay



470 before they reach the furthest downstream station, so station 16 primarily measures the copies  
471 shed from the nearest areas: a university and a shopping/business region, which are only  
472 inhabited during working hours. This phenomenon indicates that the interaction between  
473 viral load and viral decay can be complex and that a detailed sewer model is necessary to  
474 adequately describe its impact on the reliability of wastewater viral loads as an indicator of  
475 disease prevalence.

### 476 3.7. Virus Normalization

477 Wastewater systems can have – as outlined above – variable flow rates depending on factors  
478 like precipitation and water usage. Hence, wastewater samples have to be normalized to  
479 ensure accurate and reliable data interpretation. The two most commonly used normalization  
480 strategies are based on either flow rates or additional indicators like the concentration of  
481 Pepper Mild Mottle Virus (PMMoV). PMMoV is a plant virus commonly found in human  
482 feces at relatively stable concentrations and hence, serves as a good indicator for the amount  
483 of human waste in the sample. Here, we use the model to assess which normalization strategy  
484 yields corrected viral load values closest to the those one would measure if there was no  
485 precipitation event.

486 The normalization is calculated using one of the following two strategies:

- 487 • normalization with flow rates:  $[\text{RNA}]_{\text{normalized}} = \frac{Q}{\text{mean}(Q_{\text{dry}})} \cdot [\text{RNA}]$
- 488 • normalization with PMMoV:  $[\text{RNA}]_{\text{normalized}} = \frac{\text{mean}([\text{PMMoV}]_{\text{dry}})}{[\text{PMMoV}]} \cdot [\text{RNA}]$

489 where  $Q$  is the current flow rate,  $\text{mean}(Q_{\text{dry}})$  the mean flow rate on dry days,  $[\text{PMMoV}]$  the  
490 current PMMoV concentration, and  $\text{mean}([\text{PMMoV}]_{\text{dry}})$  the mean concentration of PMMoV  
491 on dry days [31]. Rainwater infiltration into a sewer system dilutes PMMoV while increasing  
492 flow rates, so correcting wastewater measurements using the ratio between the expected and  
493 measured PMMoV concentration or between the measured and expected flow rate can help  
494 reduce unwanted variability in wastewater-based data.

495 We followed exactly these procedures using simulated data. To simulate measurements of  
496 PMMoV we assumed a constant PMMoV shedding per agent throughout the simulations  
497 and that PMMoV is never subject to viral decay. A small number of observations (between  
498 0.15% and 0.28% per scenario), for which the measured PMMoV concentration was zero  
499 copies per liter, were removed. As seen in Fig. 9(b), flow rate normalization (right column)  
500 is not effective for correcting wastewater measurements in our model for the effects of either  
501 moderate gentle or moderate rain. In both the moderate gentle and moderate rain scenarios,  
502 infiltration of rainwater into the model sewer system causes greater proportional increases to  
503 the flow rates than decreases to the virus concentrations, so normalization with flow rates

504 leads to notable over-corrections. In contrast, normalization with PMMoV (center column)  
505 appears highly effective. Rainwater infiltration affects PMMoV and the virus of interest  
506 similarly, so the PMMoV-normalized measurements, while noisier, generally match the no-  
507 rain reference scenario in terms of both shape and scale. Specifically, applying PMMoV  
508 normalization reduces the median (across all simulations and time points) of the absolute  
509 error between the virus concentration at station 16 for the moderate rain, no decay scenario  
510 and the no rain, no decay reference scenario from about 113 to about 8 copies per liter  
511 (see Fig. 9(d) and Supplementary Table C.5). Since our PMMoV normalization approach  
512 corrects only for rainfall and not for viral decay, PMMoV normalization only marginally  
513 improves the median absolute error compared to the reference scenario for the moderate  
514 rain, exponential decay and the moderate rain, linear decay scenarios. However, PMMoV  
515 appears even less effective when the viral decay is linear rather than exponential. This  
516 is likely because in the linear decay scenario, unlike the exponential decay scenario, viral  
517 concentrations can and do degrade to zero, which renders normalization useless for certain  
518 observations.

519 Rain reduces the cross-correlations between overall prevalence in the catchment area and  
520 the measured RNA copies per liter in wastewater samples over time (see Fig. 10). For  
521 the scenarios with rain but without viral decay, applying PMMoV normalization to the  
522 wastewater measurements restores the cross-correlation coefficients to very close to their  
523 levels in the reference scenario. For the scenarios with both rain and viral decay, PMMoV  
524 normalization partially restores the general trends in viral load measurements over time, and  
525 therefore has a more limited but non-negligible impact on cross-correlations.

## 526 4. Discussion

527 In this study, we presented a first integrative model for the fine-grained description of infec-  
528 tious disease dynamics and wastewater surveillance. The model couples a stochastic model  
529 of individual mobility, infection transmission, and disease progression with a highly detailed  
530 hydrodynamic model of viral RNA transport through wastewater networks. Using this model  
531 for the description of a synthetic neighborhood and corresponding sewer system, we were able  
532 to investigate the influence of sampling protocols, precipitation events, virus characteristics,  
533 and normalization strategies on the relationship between infection dynamics and resulting  
534 wastewater measurements. We found that locations for sampling stations should be chosen  
535 carefully, so that they lie downstream of a sufficient number of agents and diverse location  
536 types; that precipitation and viral decay can have unexpected, nonlinear impacts on wastew-  
537 ater viral load that require detailed integrative modeling approaches to be understood; and  
538 that flow rate normalization should only be implemented with caution as it can lead to large  
539 over-corrections if there has recently been precipitation. Overall, our study suggests that if

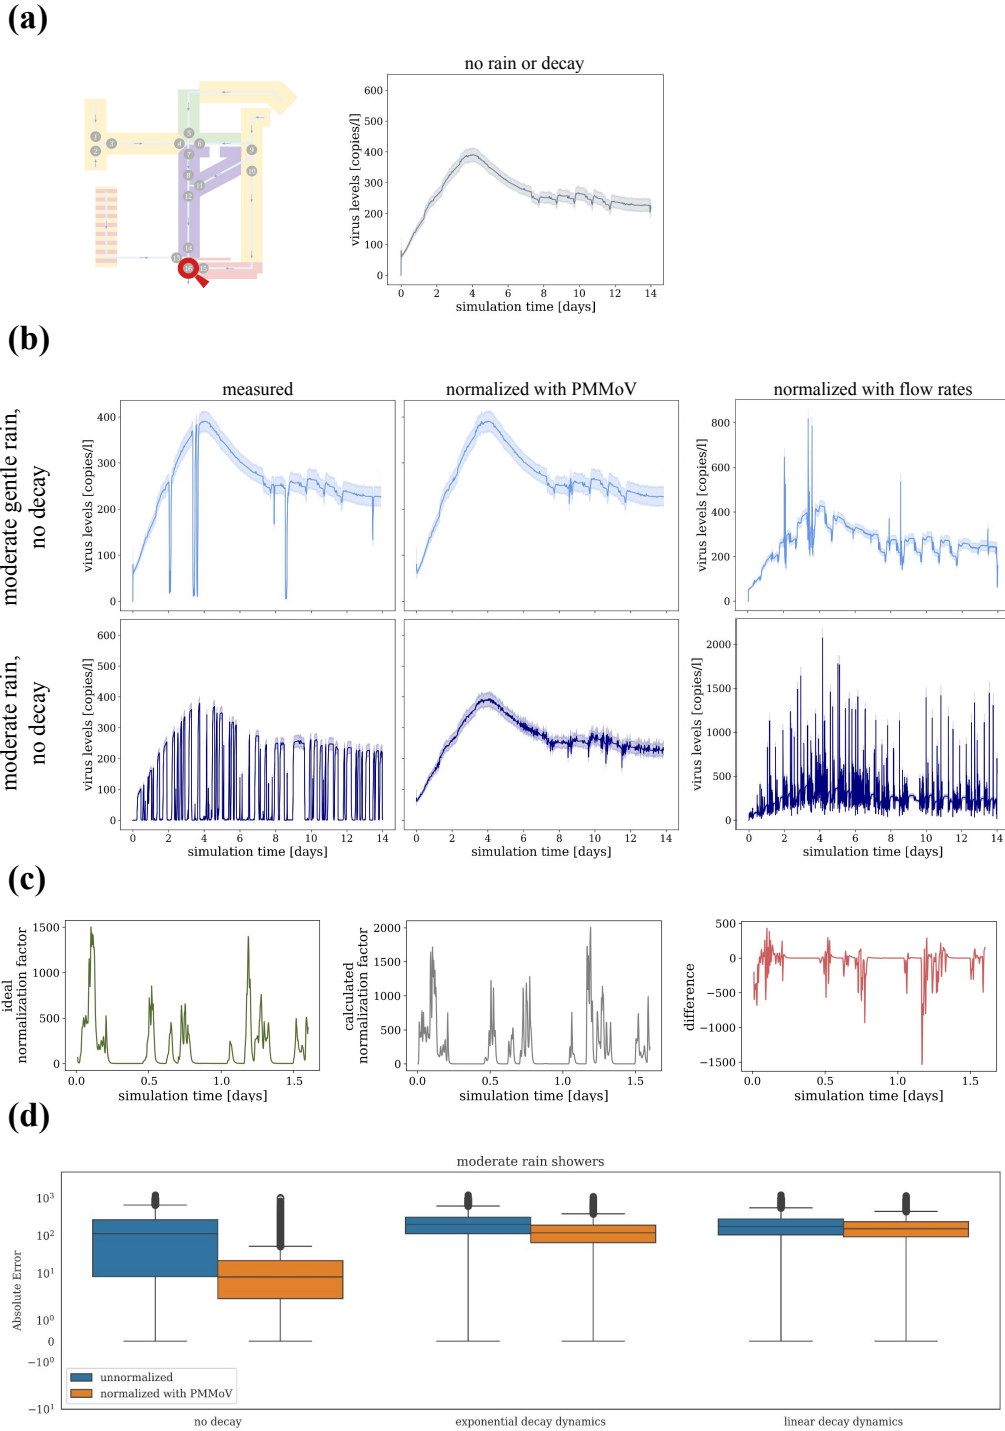

Figure 9: **Normalization Strategies Applied to Simulations.** (a) The virus concentration at station 16 in the no-rain, no-decay reference scenario. (b) The virus concentration at station 16 in the moderate gentle rain (top) or moderate rain (bottom) scenarios, as measured (left), after normalization with PMMoV (center), and after normalization with flow rates (right). (c) Comparison of the “ideal” normalization factor that would transform the moderate rain results to the no-rain reference results, versus the actual flow-rate-based normalization factor, for one example simulation. (d) The distribution over all simulations and time points of the absolute error between the moderate rain results with no, exponential, or linear decay dynamics and the no-rain, no-decay reference scenario.

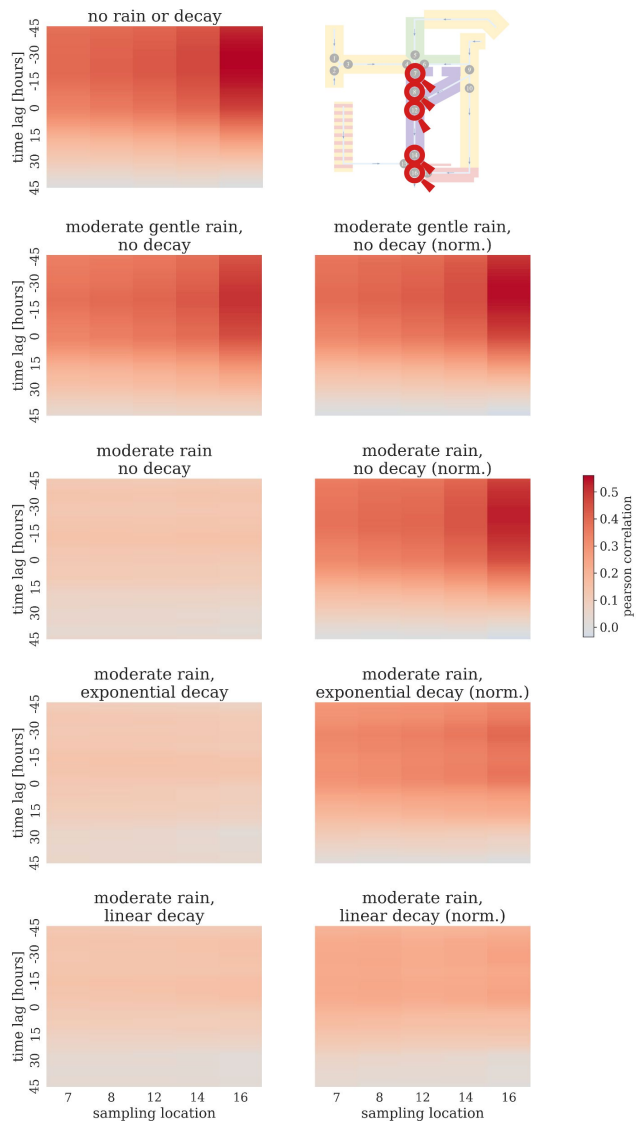

Figure 10: **Cross-Correlations Between Wastewater Samples and Prevalence by Scenario.** Pearson cross-correlations between RNA copies per liter in wastewater and prevalence over time for five downstream stations, averaged over 250 simulations, for the no-rain, no-decay reference scenario (top left), various decay and rain scenarios without normalization (left column), and the same decay and rain scenarios with PMMoV normalization (right column).

540 appropriate sampling, normalization, and analysis techniques are used, then wastewater may  
541 serve as a leading indicator of disease prevalence.

542 Sampling station characteristics – including the size of the upstream population, the times of  
543 day during which the upstream areas are generally populated, and the distribution of sewer  
544 travel times to the station – can both qualitatively and quantitatively affect wastewater mea-  
545 surement dynamics. To produce the highest correlations with prevalence, our study indicates  
546 that sampling stations should be placed far enough downstream to receive wastewater from  
547 a representative sample of the population of interest as well as from a mix of homes, places  
548 of work and study, and recreational areas. If infections are distributed throughout the catch-  
549 ment area, then 24-hour compound sampling can help alleviate some of the disadvantages of  
550 upstream sampling location placement, but if infections are localized, downstream placement  
551 becomes more crucial, as a sampling station too far upstream may miss the outbreak entirely.  
552 However, these considerations must be balanced against others: our study showed how the  
553 effects of viral decay become more pronounced the further downstream a sampling station  
554 is, and in real-world scenarios, inflow of industrial wastewater may also be a concern. Thus,  
555 while we generally argue for mid- or downstream sampling locations, a detailed modeling  
556 approach like ours is needed to choose the optimal sampling location for a particular region  
557 of interest.

558 Our study also illustrates how precipitation and viral decay, separately or together, can  
559 have complex and nonlinear impacts on the measured viral load in wastewater, which need  
560 to be accounted for when using wastewater data as a public health indicator. Due to the  
561 interactions between evaporation, water retention, and other factors, the influence of rainfall  
562 on sewer flow rates and viral concentrations within different pipes can be difficult to predict;  
563 for example, our model shows how a continuous drizzle can potentially lead to discrete  
564 drops in wastewater measurements. Although using sensors to measure sewer flow rates at  
565 a sampling station and then adjusting wastewater measurement accordingly is possible, this  
566 approach performed sub-optimally in our study and often led to dramatic over-corrections.  
567 We find that normalization with a human fecal indicator such as PMMoV may be preferable  
568 in sewer systems that have recently been infiltrated by rainwater. This finding is in contrast  
569 to the conclusions of Rainey et al. [36], who recommended normalization with flow rates  
570 to account for variations in the size of a sewershed’s service population. As Rainey et al.  
571 did not consider the effects of precipitation, future work should explore how best to account  
572 for both precipitation and population size when normalizing wastewater measurements for  
573 comparisons both over time and across sampling locations.

574 Like precipitation, viral decay in our study led to both qualitative and quantitative changes  
575 in the viral load trajectory measured at a particular station over time. Our decay scenarios  
576 were intentionally exaggerated – we considered exponential decay with a 90% reduction time  
577 of about 0.6 hours, whereas the actual 90% reduction time of SARS-CoV-2 in wastewater is

578 temperature-dependent but usually estimated to be upwards of five days – but this extreme  
579 case illustrates how the signal from surface areas far from the sampling location can be  
580 lost if viral decay is not appropriately accounted for. In our study, we found that even  
581 in the presence of rapid viral decay, PMMoV normalization could restore non-negligible  
582 correlations between prevalence and wastewater measurements, but it could only slightly  
583 reduce the absolute error relative to a no-rain, no-decay reference scenario. Since PMMoV is  
584 very stable in wastewater, normalization with PMMoV alone cannot account for the effects of  
585 viral decay on wastewater measurements. Instead, an appropriate viral decay model should  
586 be chosen based on the characteristics of the virus of interest and the sewer system, including  
587 temperature [14] and biofilms [44] – both of which are likely to be affected in turn by the  
588 amount of precipitation in the pipes. Due to its level of detail, our study provides new  
589 insights into the interactions between rain, viral decay, and wastewater measurements and  
590 underscores the importance of appropriate normalization and analysis of wastewater data.

591 Overall, our study indicates that despite potential confounding factors, if appropriate sam-  
592 pling, normalization, and analysis techniques are utilized, then wastewater-based surveillance  
593 data can provide insights into trends in disease prevalence and possibly predict outbreak peaks  
594 1 to 2 days before they occur. Viral load measurements in wastewater depend not only on  
595 the total number of people shedding, but also on the viral load – and, by extension, the infec-  
596 tiousness – of each prevalent infection. High viral loads in wastewater indicate high infection  
597 potential across the catchment area, meaning that new infections are likely to occur soon;  
598 thus, in our model, the peak in viral load measurements at the furthest downstream station  
599 tended to occur about 30 hours before the corresponding peak in overall prevalence. Previous  
600 studies, such as the one by Peccia et al. [34], have found that epidemiological measures such  
601 as positive test counts and hospital admissions tend to lag several days behind wastewater  
602 measurements, and our study suggests that this may not be entirely due to reporting delays.  
603 Thus, our results support Peccia et al.’s conclusion that wastewater-based surveillance data  
604 can help guide public health officials in deciding when to implement or ease infection control  
605 measures.

#### 606 *4.1. Limitations and Future Work*

607 One limitation of our model is that we assumed each agent’s water usage to be distributed  
608 uniformly across the day. In reality, an individual would only produce wastewater – and, if  
609 infected, shed into the sewer system – at certain time points, e.g. while using the bathroom at  
610 home after waking up in the morning. We expect that realistic patterns of water usage over  
611 time would likely create additional daily trends in wastewater measurements and highlight  
612 the advantages of 24-hour compound sampling over grab samples, but future work on this  
613 model should incorporate the circadian rhythm of water consumption and shedding behavior  
614 to confirm this.

615 We also leave for future work a sensitivity analysis of how relaxing the assumptions under-  
616 lying our shedding model might affect our results. Reinfections, vaccinations, and cross-talk  
617 between co-circulating pathogens were out of the scope of this initial model, and we therefore  
618 did not consider, for example, how the effects of vaccinations on viral shedding [11] could  
619 complicate the relationship between disease dynamics and wastewater measurements. Due  
620 to data limitations, we assumed that viral shedding in urine and feces was proportional to  
621 respiratory shedding and that the peak viral load value was the same for all symptomatic  
622 infections, although realistic variations in this value across individuals might decrease the  
623 cross-correlations between prevalence and wastewater measurements when the number of  
624 infections is small.

625 Finally, the methods we have so far only applied in the context of an synthetic neighborhood  
626 should, in the future, be adapted to real-world scenarios. This will require, for example,  
627 introducing an appropriate noise model to account for the effects of wastewater measurement  
628 uncertainty and detection limits. Thus, our model’s potential ability to map real-world  
629 wastewater measurements back to underlying prevalence remains to be tested.

#### 630 *4.2. Conclusions*

631 Our study illustrates the value of sophisticated models of infection and wastewater dynamics  
632 and highlights the potential of wastewater-based surveillance data to reflect trends in preva-  
633 lence without being influenced by sampling bias, reporting delays, or under-ascertainment.  
634 While applications to real-world data remain for future work, our simulation study provided  
635 key insights into the advantages of downstream sampling location placement, 24-hour com-  
636 pound sampling, models for the effects of viral decay, and PMMoV normalization.

## 637 **Funding**

638 This work was supported by the Deutsche Forschungsgemeinschaft (DFG, German Research  
639 Foundation) under Germany’s Excellence Strategy (EXC 2047 – 390685813, EXC 2151 –  
640 390873048), by the German Federal Ministry of Education and Research (BMBF) (INSIDe  
641 – grant numbers 031L0297A, 031L0297B, 031L0297D, and 031L0297E), and by the Univer-  
642 sity of Bonn (via the Schlegel Professorship of J.H.). It was furthermore supported by the  
643 Initiative and Networking Fund of the Helmholtz Association (grant agreement number KA1-  
644 Co-08, Project LOKI-Pandemics) and the Deutsche Forschungsgemeinschaft (DFG, German  
645 Research Foundation) (grant agreement 528702961).

## 646 **Author Contributions**

647 N.S. – conceptualization, methodology, formal analysis, investigation, writing — original  
648 draft, writing — review & editing, visualization; J.B. – methodology, software, writing —  
649 original draft, writing — review & editing; A.F.H. – methodology, software, writing — origi-  
650 nal draft, writing — review & editing, funding acquisition; K.W.S – formal analysis, writing  
651 — original draft, writing — review & editing, visualization; D.K. – methodology, software,  
652 writing — review & editing; A.W. – validation, writing — review & editing, supervision,  
653 funding acquisition; M.J.K – validation, writing — review & editing, supervision, funding  
654 acquisition; J.H – validation, writing — review & editing, supervision, project administration,  
655 funding acquisition.

## 656 **Implementation and Availability**

657 The version of MEmilio used in this study, including all input files, is publicly available at  
658 <https://github.com/SciCompMod/memilio/tree/inside-demonstrator-final>. Access to  
659 the software ++SYSTEMS and its documentation is available upon reasonable request to an-  
660 dreas.hofmann@tandler.com; all parameter files and simulation outputs used in this study are  
661 available at <https://doi.org/10.5281/zenodo.14046493>. Results were analyzed using the  
662 Python code available at [https://github.com/inside-consortium/inside\\_demonstrator](https://github.com/inside-consortium/inside_demonstrator).



663 **References**

- 664 [1] Warish Ahmed, Paul M. Bertsch, Kyle Bibby, Eiji Haramoto, Joanne Hewitt, Flavia  
665 Huygens, Pradip Gyawali, Asja Korajkic, Shane Riddell, Samendra P. Sherchan, Stu-  
666 art L. Simpson, Kwanrawee Sirikanchana, Erin M. Symonds, Rory Verhagen, Seshadri S.  
667 Vasan, Masaaki Kitajima, and Aaron Bivins. Decay of SARS-CoV-2 and surrogate  
668 murine hepatitis virus RNA in untreated wastewater to inform application in wastewater-  
669 based epidemiology. *Environmental Research*, 191, 2020.
- 670 [2] Peter M. Bach, Wolfgang Rauch, Peter S. Mikkelsen, David T. McCarthy, and Ana  
671 Deletic. A critical review of integrated urban water modelling – urban drainage and  
672 beyond. *Environmental Modelling & Software*, 54:88–107, 2014.
- 673 [3] LfU Bayern. NiedSimBy: Synthetische Niederschlagsreihen - LfU Bayern, 2024. [https://www.lfu.bayern.de/wasser/abwasser\\_synthetische\\_niederschlagsreihen/](https://www.lfu.bayern.de/wasser/abwasser_synthetische_niederschlagsreihen/index.htm)  
674 [index.htm](https://www.lfu.bayern.de/wasser/abwasser_synthetische_niederschlagsreihen/index.htm) (visited on 02/20/2024).  
675
- 676 [4] Julia Bicker, René Schmieding, Michael Meyer-Hermann, and Martin J. Kühn. Hybrid  
677 metapopulation agent-based epidemiological models for efficient insight on the individual  
678 scale: a contribution to green computing. 2024. Submitted for publication. <https://arxiv.org/abs/2406.04386>.  
679
- 680 [5] Jean-Baptiste Burnet, Henry-Michel Cauchie, Cécile Walczak, Nathalie Goeders, and  
681 Leslie Ogorzaly. Persistence of endogenous rna biomarkers of sars-cov-2 and pmmov in  
682 raw wastewater: Impact of temperature and implications for wastewater-based epidemi-  
683 ology. *Science of The Total Environment*, 857, 2023.
- 684 [6] François M. Castonguay, Julie C. Blackwood, Emily Howerton, Katriona Shea, Charles  
685 Sims, and James N. Sanchirico. Optimal spatial evaluation of a pro rata vaccine distri-  
686 bution rule for covid-19. *Scientific Reports*, 13(1):2194, 2023.
- 687 [7] Min-Kyung Chae, Dong-Uk Hwang, Kyeongah Nah, and Woo-Sik Son. Evaluation of  
688 COVID-19 intervention policies in South Korea using the stochastic individual-based  
689 model. *Scientific Reports*, 13(1):18945, 2023.
- 690 [8] Daniel Champredon, Irena Papst, and Warsame Yusuf. ern: An r package to estimate  
691 the effective reproduction number using clinical and wastewater surveillance data. *PLoS*  
692 *ONE*, 19(6), 2024.
- 693 [9] K.K. Chau, L. Barker, E.P. Budgell, K.D. Vihta, N. Sims, B. Kasprzyk-Hordern, E. Har-  
694 riss, D.W. Crook, D.S. Read, A.S. Walker, and N. Stoesser. Systematic review of  
695 wastewater surveillance of antimicrobial resistance in human populations. *Environment*  
696 *International*, 162:107171, 2022.

- 697 [10] Lorenzo Contento, Noemi Castelletti, Elba Raimúndez, Ronan Le Gleut, Yannik Schälte,  
698 Paul Stapor, Ludwig Christian Hinske, Michael Hoelscher, Andreas Wieser, Katja  
699 Radon, Christiane Fuchs, and Jan Hasenauer. Integrative modelling of reported case  
700 numbers and seroprevalence reveals time-dependent test efficiency and infectious con-  
701 tacts. *Epidemics*, 43:100681, 2023.
- 702 [11] Miguel Garcia-Knight, Khamal Anglin, Michel Tassetto, Scott Lu, Amethyst Zhang,  
703 Sarah A Goldberg, Adam Catching, Michelle C Davidson, Joshua R Shak, Mariela  
704 Romero, Jesus Pineda-Ramirez, Ruth Diaz-Sanchez, Paulina Rugart, Kevin Donohue,  
705 Jonathan Massachi, Hannah M Sans, Manuella Djomaleu, Sujata Mathur, Venice Servel-  
706 lita, David McIlwain, Brice Gaudiliere, Jessica Chen, Enrique O Martinez, Jacqueline M  
707 Tavs, Grace Bronstone, Jacob Weiss, John T Watson, Melissa Briggs-Hagen, Glen R  
708 Abedi, George W Rutherford, Steven G Deeks, Charles Chiu, Sharon Saydah, Michael J  
709 Peluso, Claire M Midgley, Jeffrey N Martin, Raul Andino, and J Daniel Kelly. Infectious  
710 viral shedding of SARS-CoV-2 Delta following vaccination: A longitudinal cohort study.  
711 *PLoS Pathogens*, 18(9):e1010802, September 2022.
- 712 [12] Esayas Kebede Gudina, Kira Elsbernd, Daniel Yilma, Rebecca Kisch, Karina Wallrafen-  
713 Sam, Gameda Abebe, Zeleke Mekonnen, Melkamu Berhane, Mulusew Gerbaba, Sultan  
714 Suleman, Yoseph Mamo, Raquel Rubio-Acero, Solomon Ali, Ahmed Zeynudin, Simon  
715 Merkt, Jan Hasenauer, Temesgen Kabeta Chala, Andreas Wieser, and Arne Kroidl.  
716 Tailoring COVID-19 vaccination strategies in high-seroprevalence settings: Insights from  
717 Ethiopia. *Vaccines*, 12(7):745, 2024. PubMed-not-MEDLINE.
- 718 [13] Ying Guo, Yanchen Liu, Shuhong Gao, Xu Zhou, Muttucumaru Sivakumar, and Guang-  
719 ming Jiang. Effects of temperature and water types on the decay of coronavirus: A  
720 review. *Water*, 15, 2023.
- 721 [14] Olga E. Hart and Rolf U. Halden. Computational analysis of SARS-CoV-2/COVID-19  
722 surveillance by wastewater-based epidemiology locally and globally: Feasibility, econ-  
723 omy, opportunities and challenges. *Science of The Total Environment*, 730:138875, Au-  
724 gust 2020.
- 725 [15] Robert Hinch, William J. M. Probert, Anel Nurtay, Michelle Kendall, Chris Wymant,  
726 Matthew Hall, Katrina Lythgoe, Ana Bulas Cruz, Lele Zhao, Andrea Stewart, Luca  
727 Ferretti, Daniel Montero, James Warren, Nicole Mather, Matthew Abueg, Neo Wu,  
728 Olivier Legat, Katie Bentley, Thomas Mead, Kelvin Van-Vuuren, Dylan Feldner-Busztin,  
729 Tommaso Ristori, Anthony Finkelstein, David G. Bonsall, Lucie Abeler-Dörner, and  
730 Christophe Fraser. OpenABM-Covid19—An agent-based model for non-pharmaceutical  
731 interventions against COVID-19 including contact tracing. *PLOS Computational Biol-*  
732 *ogy*, 17(7):e1009146, July 2021.

- 733 [16] B. R. Hodges. Conservative finite-volume forms of the saint-venant equations for hy-  
734 drology and urban drainage. *Hydrology and Earth System Sciences*, 23(3):1281–1304,  
735 2019.
- 736 [17] Laura D. Howe, Kate Tilling, Bruna Galobardes, and Debbie A. Lawlor. Loss to follow-  
737 up in cohort studies: Bias in estimates of socioeconomic inequalities. *Epidemiology*,  
738 24(1), 2013.
- 739 [18] Elizabeth Hunter, Brian Mac Namee, and John Kelleher. A Hybrid Agent-Based and  
740 Equation Based Model for the Spread of Infectious Diseases. *Journal of Artificial Soci-  
741 eties and Social Simulation*, 23(4):14, 2020.
- 742 [19] Christopher I. Jarvis, Kevin Van Zandvoort, Amy Gimma, Kiesha Prem, Megan Auzen-  
743 bergs, Kathleen O’Reilly, Graham Medley, Jon C. Emery, Rein M. G. J. Houben,  
744 Nicholas Davies, Emily S. Nightingale, Stefan Flasche, Thibaut Jombart, Joel Hellewell,  
745 Sam Abbott, James D. Munday, Nikos I. Bosse, Sebastian Funk, Fiona Sun, Akira  
746 Endo, Alicia Rosello, Simon R. Procter, Adam J. Kucharski, Timothy W. Russell, Gwen  
747 Knight, Hamish Gibbs, Quentin Leclerc, Billy J. Quilty, Charlie Diamond, Yang Liu,  
748 Mark Jit, Samuel Clifford, Carl A. B. Pearson, Rosalind M. Eggo, Arminder K. Deol,  
749 Petra Klepac, G. James Rubin, W. John Edmunds, and CMMID COVID-19 working  
750 group. Quantifying the impact of physical distance measures on the transmission of  
751 covid-19 in the uk. *BMC Medicine*, 18(1):124, 2020.
- 752 [20] Terry C. Jones, Guido Biele, Barbara Mühlemann, Talitha Veith, Julia Schneider, Jörn  
753 Beheim-Schwarzbach, Tobias Bleicker, Julia Tesch, Marie Luisa Schmidt, Leif Erik  
754 Sander, Florian Kurth, Peter Menzel, Rolf Schwarzer, Marta Zuchowski, Jörg Hofmann,  
755 Andi Krumbholz, Angela Stein, Anke Edelmann, Victor Max Corman, and Christian  
756 Drost. Estimating infectiousness throughout SARS-CoV-2 infection course. *Science*,  
757 373(6551):eabi5273, July 2021.
- 758 [21] David Kerkmann, Sascha Korf, Khoa Nguyen, Daniel Abele, Alain Schengen, Carlotta  
759 Gerstein, Jens Henrik Göbbert, Achim Basermann, Martin J. Kühn, and Michael Meyer-  
760 Hermann. Agent-based modeling for realistic reproduction of human mobility and con-  
761 tact behavior to evaluate test and isolation strategies in epidemic infectious disease  
762 spread. 2024. Submitted for publication. <https://arxiv.org/abs/2410.08050>.
- 763 [22] Cliff C. Kerr, Robyn M. Stuart, Dina Mistry, Romesh G. Abeysuriya, Katherine Rosen-  
764 feld, Gregory R. Hart, Rafael C. Núñez, Jamie A. Cohen, Prashanth Selvaraj, Brittany  
765 Hagedorn, Lauren George, Michal Jastrzebski, Amanda S. Izzo, Greer Fowler, Anna  
766 Palmer, Dominic Delpont, Nick Scott, Sherrie L. Kelly, Caroline S. Bennette, Bradley G.  
767 Wagner, Stewart T. Chang, Assaf P. Oron, Edward A. Wenger, Jasmina Panovska-  
768 Griffiths, Michael Famulare, and Daniel J. Klein. Covasim: An agent-based model of

- 769 COVID-19 dynamics and interventions. *PLOS Computational Biology*, 17(7):1–32, July  
770 2021. Publisher: Public Library of Science.
- 771 [23] Pruthvi Kilaru, Dustin Hill, Kathryn Anderson, Mary B Collins, Hyatt Green, Brit-  
772 tany L Kmush, and David A Larsen. Wastewater Surveillance for Infectious Disease: A  
773 Systematic Review. *American Journal of Epidemiology*, 192(2):305–322, 10 2022.
- 774 [24] Martin Joachim Kühn, Daniel Abele, David Kerkmann, Sascha Alexander Korf, Hen-  
775 rik Zunker, Anna Clara Wendler, Julia Bicker, Dang Khoa Nguyen, René Schmieding,  
776 Lena Plötzke, Patrick Lenz, Maximilian Franz Betz, Carlotta Gerstein, Agatha Schmidt,  
777 Paul Johannssen, Margrit Klitz, Sebastian Binder, Martin Siggel, Wadim Koslow,  
778 Jan Kleinert, Kathrin Rack, Annette Lutz, and Michael Meyer-Hermann. Memilio  
779 v1.0.0 - a high performance modular epidemics simulation software, December 2023.  
780 <https://zenodo.org/records/10412635>.
- 781 [25] Martin J. Kühn, Daniel Abele, Tanmay Mitra, Wadim Koslow, Majid Abedi, Kathrin  
782 Rack, Martin Siggel, Sahamoddin Khailaie, Margrit Klitz, Sebastian Binder, Luca  
783 Spataro, Jonas Gilg, Jan Kleinert, Matthias Häberle, Lena Plötzke, Christoph D. Spin-  
784 ner, Melanie Stecher, Xiao Xiang Zhu, Achim Basermann, and Michael Meyer-Hermann.  
785 Assessment of effective mitigation and prediction of the spread of SARS-CoV-2 in Ger-  
786 many using demographic information and spatial resolution. *Mathematical Biosciences*,  
787 page 108648, 2021.
- 788 [26] Daniel B. Larremore, Bryan Wilder, Evan Lester, Soraya Shehata, James M. Burke,  
789 James A. Hay, Milind Tambe, Michael J. Mina, and Roy Parker. Test sensitivity is  
790 secondary to frequency and turnaround time for COVID-19 screening. *Science Advances*,  
791 7(1):eabd5393, 2021.
- 792 [27] Ardashel Latsuzbaia, Malte Herold, Jean-Paul Bertemes, and Joël Mossong. Evolving  
793 social contact patterns during the COVID-19 crisis in Luxembourg. *PLOS ONE*, 15(8):1–  
794 13, 08 2020.
- 795 [28] H. Lau, T. Khosrawipour, P. Kocbach, H. Ichii, J. Bania, and V. Khosrawipour. Evalu-  
796 ating the massive underreporting and undertesting of covid-19 cases in multiple global  
797 epicenters. *Pulmonology*, 27(2):110–115, 2021.
- 798 [29] Lars Lorch, Heiner Kremer, William Trouleau, Stratis Tsirtsis, Aron Szanto, Bernhard  
799 Schölkopf, and Manuel Gomez-Rodriguez. Quantifying the effects of contact tracing,  
800 testing, and containment measures in the presence of infection hotspots. *ACM Trans.*  
801 *Spatial Algorithms Syst.*, 8(4), nov 2022.
- 802 [30] Louise A C Millard, Alba Fernández-Sanlés, Alice R Carter, Rachael A Hughes, Kate  
803 Tilling, Tim P Morris, Daniel Major-Smith, Gareth J Griffith, Gemma L Clayton, Emily

- 804 Kawabata, George Davey Smith, Deborah A Lawlor, and Maria Carolina Borges. Ex-  
805 ploring the impact of selection bias in observational studies of COVID-19: a simulation  
806 study. *International Journal of Epidemiology*, 52(1):44–57, 12 2022.
- 807 [31] Alexander Mitranescu, Anna Uchaikina, Anna-Sonia Kau, Claudia Stange, Johannes  
808 Ho, Andreas Tiehm, Christian Wurzbacher, and Jörg E. Drewes. Wastewater-based epi-  
809 demiology for SARS-CoV-2 biomarkers: Evaluation of normalization methods in small  
810 and large communities in southern germany. *ACS ES&T Water*, 2(12):2460–2470, Dec  
811 2022.
- 812 [32] Shokoofeh Nourbakhsh, Aamir Fazil, Michael Li, Chand S. Mangat, Shelley W. Peter-  
813 son, Jade Daigle, Stacie Langner, Jayson Shurgold, Patrick D’Aoust, Robert Delatolla,  
814 Elizabeth Mercier, Xiaoli Pang, Bonita E. Lee, Rebecca Stuart, Shinthuja Wijayasri, and  
815 David Champredon. A wastewater-based epidemic model for sars-cov-2 with application  
816 to three canadian cities. *Epidemics*, 39:100560, 2022.
- 817 [33] Matías Núñez, Nadia L. Barreiro, Rafael A. Barrio, and Christopher Rackauckas. Fore-  
818 casting virus outbreaks with social media data via neural ordinary differential equations.  
819 *Scientific Reports*, 13(1):10870, 2023.
- 820 [34] Jordan Peccia, Alessandro Zulli, Doug E. Brackney, Nathan D. Grubaugh, Edward H.  
821 Kaplan, Arnau Casanovas-Massana, Albert I. Ko, Aryn A. Malik, Dennis Wang, Mike  
822 Wang, Joshua L. Warren, Daniel M. Weinberger, Wyatt Arnold, and Saad B. Omer.  
823 Measurement of SARS-CoV-2 RNA in wastewater tracks community infection dynamics.  
824 *Nature Biotechnology*, 38(10):1164–1167, October 2020. Publisher: Nature Publishing  
825 Group.
- 826 [35] Elba Raimúndez, Erika Dudkin, Jakob Vanhoefer, Emad Alamoudi, Simon Merkt, Lara  
827 Fuhrmann, Fan Bai, and Jan Hasenauer. COVID-19 outbreak in Wuhan demonstrates  
828 the limitations of publicly available case numbers for epidemiological modeling. *Epi-  
829 demics*, 34:100439, 2021.
- 830 [36] Andrew L. Rainey, Song Liang, Joseph H. Bisesi Jr., Tara Sabo-Attwood, and An-  
831 thony T. Maurelli. A multistate assessment of population normalization factors for  
832 wastewater-based epidemiology of covid-19. *PLoS ONE*, 18(4):e0284370, April 2023.
- 833 [37] Fachgebiet 32 Robert Koch-Institut. Abwassersurveillance AMELAG, September 2024.
- 834 [38] Manfred R. Schütze, David Butler, and M. Bruce Beck. *Development of the Integrated  
835 Simulation and Optimisation Tool SYNOPSIS*, pages 129–178. Springer London, Lon-  
836 don, 2002.

- 837 [39] Mark J. Siedner, Guy Harling, Zahra Reynolds, Rebecca F. Gilbert, Sebastien Haneuse,  
838 Atheendar S. Venkataramani, and Alexander C. Tsai. Social distancing to slow the  
839 US COVID-19 epidemic: Longitudinal pretest–posttest comparison group study. *PLOS*  
840 *Medicine*, 17(8):1–12, 08 2020.
- 841 [40] Statistisches Bundesamt. Mikrozensus. Accessible for 2020 to 2023 on [https://www-genesis.destatis.de/genesis/online?operation=statistic&levelindex=  
842 //www-genesis.destatis.de/genesis/online?operation=statistic&levelindex=  
843 &levelid=&code=12211&option=table&info=on#abreadcrumb](https://www-genesis.destatis.de/genesis/online?operation=statistic&levelindex=&levelid=&code=12211&option=table&info=on#abreadcrumb).
- 844 [41] tandler.com GmbH. DYNA - Komplexes Parallelschrittverfahren - Verfahrensbeschrei-  
845 bung. Technical report, 2024.
- 846 [42] Deutscher Wetterdienst. Wetter und Klima - Deutscher Wetterdienst - Glossar - N  
847 - Niederschlagsintensität (dwd.de), 2024. [https://www.dwd.de/DE/service/lexikon/  
848 Functions/glossar.html?lv3=101906&lv2=101812](https://www.dwd.de/DE/service/lexikon/Functions/glossar.html?lv3=101906&lv2=101812) (visited on 02/20/2024).
- 849 [43] Fuqing Wu, Jianbo Zhang, Amy Xiao, Xiaoqiong Gu, Wei Lin Lee, Federica Armas,  
850 Kathryn Kauffman, William Hanage, Mariana Matus, Newsha Ghaeli, Noriko Endo,  
851 Claire Duvallet, Mathilde Poyet, Katya Moniz, Alex D. Washburne, Timothy B. Er-  
852 ickson, Peter R. Chai, Janelle Thompson, and Eric J. Alm. SARS-CoV-2 Titers in  
853 Wastewater Are Higher than Expected from Clinically Confirmed Cases. *mSystems*,  
854 5(4):10.1128/msystems.00614–20, July 2020. Publisher: American Society for Microbi-  
855 ology.
- 856 [44] Shuxin Zhang, Elipsha Sharma, Ananda Tiwari, Yan Chen, Samendra P. Sherchan,  
857 Shuhong Gao, Xu Zhou, Jiahua Shi, and Guangming Jiang. The reduction of SARS-  
858 CoV-2 RNA concentration in the presence of sewer biofilms. *Water*, 15(11), June 2023.
- 859 [45] Henrik Zunker, René Schmieding, David Kerkmann, Alain Schengen, Sophie Diexer,  
860 Rafael Mikolajczyk, Michael Meyer-Hermann, and Martin J. Kühn. Novel travel time  
861 aware metapopulation models: A combination with multi-layer waning immunity to  
862 assess late-phase epidemic and endemic scenarios. 2024. Submitted for publication.  
863 <https://doi.org/10.1101/2024.03.01.24303602>.
